# Supplementary material
Source: PubMed Central journal article supplement (PMC2668200)
Supplement: NIHMS94126-supplement-Supplemental.pdf [file NIHMS94126-supplement-Supplemental.pdf]

## Supplemental Data

### A Two-Step Mechanism for Stem Cell

#### Activation during Hair Regeneration

Valentina Greco, Ting Chen, Michael Rendl, Markus Schober, H. Amalia Pasolli, Nicole Stokes, June dela Cruz-Racelis, and Elaine Fuchs

#### Figure S1. Hair Germ and Bulge Cells Are Ultrastructurally Distinct.

Ultrastructural analyses reveal morphological distinctions between hair germ (HG) and bulge cells. HG cells display higher cytoplasmic density but possess fewer desmosomes (De). Areas boxed in red are magnified in insets. (A) Ultrastructure of hair follicle in late telogen. Bulge (Bu) and HG cells are highlighted in green and pink, respectively. Dotted line denotes the presence of the basement membrane. Cp, companion layer contiguous to bulge cells. DP, dermal papilla; HS, hair shaft; Der, dermis. Boxed areas B and C are shown below at higher magnification. (B) Bulge cells display numerous desmosomes (De), especially in their attachment to the companion layer. Boxed area enlarged in inset, showing intercellular junctions rich in desmosomes. (C) Hair germ cells possess fewer desmosomes. Boxed area is magnified in inset, showing intercellular junctions with scarcity of desmosomes.

#### Figure S2. The Epithelial Strand of P41 Catagen HFs Contains Cells Resembling the HG Cells of P43 Telogen HFs.

(A) Ultrastructural analysis of a late catagen HF. The epithelial strand (EpStr) connects the dermal papilla (DP) with the bulge stem cells that surround the old (club) hair (Cb). The strand is composed of an ultrastructurally heterogeneous population of cells. Black dashed line denotes the dermo-epithelial border. Double headed-arrow in (A) indicates the thick glassy membrane, composed of the basal lamina and a thick layer of collagen fibers. (B-C) The boxed area in (A) is enlarged in (B) and depicts apoptotic (Ap) cells as well as cells (denoted by an asterisk) that resemble the early telogen cells of the HG, shown in (C). These cells display an electro-dense cytoplasm and few

desmosomes and they are attached to the basal lamina. Epithelial strand cells denoted by the black diamonds in (B) have a lighter cytoplasm and appear ultrastructurally distinct from HG cells. (D) Additional examples of apoptotic cells (Ap) in the EpStr of a catagen follicle. (E) Semi-thin section stained with toluidine blue of an early telogen HF. Dashed line indicates the basal lamina between HG and DP. (F) Intercellular junctions of epithelial strand cells (upper frame) resembling HG cells (lower frame). Both cells show a paucity of desmosomes. (G) HG cells facing the dermal sheath (DS) exhibit an abundance of hemidesmosomes (Hd). (H) By contrast, epithelial strand cells are attached to a convoluted basal lamina (bl) with very scarce hemidesmosomes.

**Figure S3. The Kinetic of Hair Germ Activation in the Second Telogen to Anagen Transition Are Slower Than in the First Transition.**

(A) The catagen retracting EpStr contains some Pcad(+) cells that are also positive for Sox9 (green). Data are reported as average  $\pm$  SD. (B) 1d sequential pulses with BrdU at the end of the 2<sup>nd</sup> telogen show that within 5d (P75), nearly all the cells in the HG are proliferative and have initiated new follicle downgrowths. (C) Bulge cells become activated in anagen III. 1d BrdU pulse during the telogen to anagen transition (figure 2K) reveal that the bulge (CD34 in red) gets largely activated (BrdU incorporation in green) during Anagen III. Nuclei are marked with DAPI (blue).

**Figure S4. Colony Initiation Ability of Bulge Cells Catches Up to Hair Germ Cells Over Time.** (A) Over time the total number of single cells attached to the plate diminished over time, and it did so differently between the three populations. (B) Hair germ, Bulge and total *K14-H2BGFP* skin cells (all cells) were kept in culture for 14 days, and the total numbers of GFP epifluorescent cells were counted using a FACS analyzer. Note that since HG colonies initiate faster than bulge cells, the total number of cells over the two weeks is still greater for HG cultures than bulge cultures. (C) Representative pictures of colonies under regular or GFP fluorescence-sensitive lighting. In all graphs data are reported as average  $\pm$  STDEV. Representative examples of each experiment were used and each experiment was done at least in triplicates.

### **Figure S5. Cell Isolation From Morphologically Uniform Hair Follicles**

Back skin of *K14H2BGFP* mice was carefully inspected on the dissecting scope to monitor the morphology and cycling stages of the hair follicles. (A-C) From left to right pictures show progressively higher magnification views of telogen back skin. (D) Back skin during catagen to telogen transition. Catagen hair follicles are easily recognized because of the appearance of long hair follicles and they are eliminated from the preparation. (E) Similarly, anagen hair follicles can also be quickly spotted with this whole mount preparation method because of their enlarged hair germs (arrows). (F) Back skin hair follicles of *LefRFP1/K14H2BGFP* mice at telogen. DP is RFP(+); keratinocytes are GFP(+).

### **Figure S6. Two-Step Sample Preparation**

Back skin of telogen *Lef1RFP/K14H2BGFP* mice was first treated with collagenase. The collagenase-digested mixture (Supernatant 1) was further mechanically dissociated, trypsinized and analyzed by FACS. Supernatant 1 is enriched with DP cells (RFP+) and has very few GFP(+) keratinocytes. DP cells were further isolated by FACS on the basis RFP<sup>+</sup>GFP<sup>-</sup>CD45<sup>-</sup>CD117<sup>-</sup>Itgα7<sup>-</sup> marker combinations (see Supplemental Figure 7 and Supplemental Experimental Procedures for further details). After removal of Supernatant 1, the remaining skin is further treated with trypsin. The trypsin-digested mixture (Supernatant 2) contains a high percentage of GFP(+) cells and is enriched with HG and bulge cells. These cells are isolated as described in Figure 3.

### **Figure S7. Sorting Strategy and Purification Efficiency of Dermal Papilla Cells**

(A) Immunofluorescence skin section of 2nd telogen phase back skin from mice expressing *K14H2BGFP/Lef1RFP*. Note that GFP marks the keratinocytes of the epidermis and ORS, while RFP marks the DP and arrector pili muscle. The arrector pili muscle is also positive for smooth muscle actin (SMA) and integrin α7 (Itgα7) whereas the DP is not (upper right). Alkaline Phosphatase (AP) marks both the DP and the arrector pili muscle (bottom right). (B) Total skin cells (all cells) were dissociated as described in Supplemental Figure 6 and then cytopun onto a slide. Both DP cells and

arrector pili muscle cells are present in the preparation, as shown. DP cells were purified by FACS for RFP<sup>+</sup>GFP<sup>-</sup>CD45<sup>-</sup>CD117<sup>-</sup>Itga7<sup>-</sup>. (C) mRNAs were isolated from purified DP cells and the purity of the isolation was monitored by cytospin and immunolabeling for specific markers. Known DP markers such as AP, NCAM and Hhip were enriched at the mRNA level in the DP cells as compared to the total cell preparation (minus DP), whereas SMA and integrin  $\alpha 7$  are not detected by RT PCR of the DP preparation (left). Cytospin analysis shows the absence of SMA(+) smooth muscle cells in the preparation whereas all cells within the DP prep are positive for AP (right). Data are reported as average  $\pm$  SD.

**Figure S8. Effect of Noggin, FGF7 and FGF10 on Telogen Follicle *in vivo*.**

WT (A, B, D) or *K14H2BGFP* transgenic CD1 mice (C) whose follicles were in early telogen were injected with beads soaked with BSA (A) or with the growth factors indicated in the panels (B, C, D), as described in Figure 7 and in Experimental Procedures. (A) Intradermal injection of BSA showed no effect on the early telogen dormant HG (in red) (additional example in Figure 7). (B) Intradermal injection of FGF7 resulted in precocious activation of cell cycling (Ki67 in green) in the HG and an increase in HG cell number (see also Figure 7 for additional data). (C) Intradermal injection of the BMP inhibitor Noggin led to an increase HG (in red) cell number and further downgrowth of the hair follicle. This effect appeared to be more robust than that of FGF7, but both were substantially different than the control BSA. (D-E) Intradermal injection of FGF10 also can leads to precocious activation of HG cells (in red) and induces them to proliferate (Ki67 in green). The effects of FGF10 were dosage dependent.

**Figure S9. Model Depicting Signals Regulating HF Niche Activation.**

The HF stem cell niche is maintained in an inhibitory growth state via BMPs produced both by the Bulge (Bu) and the Dermal Papilla (DP) cells at the beginning of the resting phase. During telogen, DP cells progressively enhance their expression of BMP inhibitors and FGF7. A number of so-called canonical WNTs are expressed by the HG, and the non-canonical Wnt5a is expressed by the DP.

Although it is not known which of these WNTs are essential, overall stabilization of  $\beta$ -catenin towards the end of telogen is known to be critical in transitioning HF from telogen to anagen. Our data suggest that together with WNT factors, BMP inhibition and FGF7 activation act in concert to activate MAP kinase and  $\beta$ -catenin pathway cascades in the HG, thereby stimulating its proliferation and initiating a new hair follicle growth.

## **SUPPLEMENTAL EXPERIMENTAL PROCEDURES**

### **Electron Microscopy**

Samples were fixed in 2% glutaraldehyde, 4% PFA, and 2 mM  $\text{CaCl}_2$  in 0.05 M sodium cacodylate buffer, pH 7.2, at r.t. for >1 h, postfixed in 1% osmium tetroxide, and processed for Epon embedding. Ultrathin sections (60–70 nm) were counterstained with uranyl acetate and lead citrate. Images were taken with a transmission electron microscope (Tecnai G2-12; FEI) equipped with a digital camera (model XR60; Advanced Microscopy Techniques, Corp.)

### **Histology and Immunolabeling**

All the skin samples were fixed with Formaldehyde for 10-15' at RT and the dilutions used in this paper are indicated here: Ncam (Immunotech, rat 1:50), CD34 (eBioscience, rat 1:50), Pcadherin (Fuchs lab rat 1:50, R&D, goat 1:100), Ki67 (NovoCastra, rabbit 1:300), beta-catenin (Sigma, mouse 1:100), NFATc1 (SantaCruz, mouse 1:100), Sox9 (SantaCruz, rabbit 1:100), Tcf3, Lef1 (Fuchs lab 1:100), Lhx2 (T. Jessell, Columbia, NYC rabbit 1:2000), BrdU (Abcam, rat 1:200), p44/42 MAP kinase (Cell Signaling, rabbit 1:100), Wif1 (R&D, goat 1:50), Prominin (eBioscience, rat 1:50),  $\beta$ gal (Sigma, mouse 1:5000), Ecadherin (Fuchs lab, rat 1:20), CD104-integrin  $\beta$ 4 (BD, rat 1:100), SMA (NeoMarkers, mouse 1:100). For LacZ and AP reactions skin and cytospin sections were fixed with 0.1% gluteraldehyde. For the lacZ reaction sections were exposed to Xgal solution, for AP to BCIP/NBT solution.

### **Isolation of bulge, HG and DP cells**

Subcutaneous fat was removed from the skins with a scalpel and the whole skin was placed dermis down on a HBSS solution containing 0.2% collagenase (Sigma) for 30' at 37°C. The tissue after collagenase treatment was enriched in DP cells, which were gently removed with a scalpel. The remaining tissue, containing HGs and bulges, was then treated with Trypsin (GIBCO) at 37°C for 30 minutes.

The DP-enriched fraction was washed with PBS, centrifuged and trypsinized for 5 minutes at 37°C. Subsequently, the cells were filtered with strainers (70 µm, then 40µm pores; BD Biosciences). The remaining skin cell suspension was collected and filtered through strainers (70µm, then 40µm pores; BD Biosciences).

For FACS analyses, single cell suspensions in 2% FCS in PBS were exposed for 15 minutes at 4°C to the appropriate conjugated antibodies. DP cells isolated from *LefRFP/K14H2BGFP* mice are RFP(+) GFP(-) Cy5(-) as depleted of fibroblastic, endothelial, muscle and melanocytic cells with a cocktail of the following antibodies. Integrin  $\alpha 7$  (Kramer lab, rat 1:100), Cy5 anti-rat (Jackson, 1:100), CD45-biotinylated (Pharmingen 1:100), CD117-biotinylated (Pharmingen 1:100), CD34-biotinylated (eBioscience 1:100), SA-Cy5 (Jackson, 1:100). Hair germs were isolated from *LefRFP/K14H2BGFP* mice as RFP(-) GFP(+)Pcad<sup>Hi</sup> CD34<sup>Neg</sup>. Bulges were isolated from *LefRFP/K14H2BGFP* mice as RFP(-)GFP(+) Pcad<sup>lo</sup>, CD34(+). (Pcad Biotinylated Fuchs lab, 1:100; SA Pcad Blue Invitrogen, 1:100; CD34-Alexa647 eBioscience 1:75)

### **RNA isolation and microarray analyses**

Total RNAs from FACS cells were purified using the Absolutely RNA Microprep kit (Stratagene, La Jolla, California, United States), and quantified (Nanodrop, United States). Quality was assessed by RNA 6000 Pico Assay (Agilent Technologies, Palo Alto, California, United States). Two rounds of amplification/labeling were performed on 20 nanogram to obtain biotinylated cRNA (MessageAmp aRNA kit; Ambion, Austin, Texas, United States), and 10 µg labeled cRNA was hybridized 45 °C, 16 h

to mouse genome array MOE430A2.0 (Affymetrix, Santa Clara, California, United States). Processed chips were read by an argon-ion laser confocal scanner (Genomics Core Facility, Sloan Kettering Cancer Center, New York, New York, United States). Scanned microarray images were imported into Gene Chip Operating Software (GCOS, Affymetrix) to generate signal values and absent/present calls for each probe-set using the MAS 5.0 statistical expression algorithm (.chp files). Each array was scaled to a target signal of 500 using all probe-sets and default analysis parameters. Signature gene lists for isolated hair germ and bulge cells at all 3 time points were compiled containing probesets that are  $\geq 2$ -fold increased or  $\leq 2$ -fold decreased. For functional gene annotation probeset lists were uploaded to the "Database for Annotation, Visualization and Integrated Discovery" (DAVID 2008) Web tool. To systematically analyze the level of gene expression changes in the hair germ and bulge between early, middle and late telogen fold changes were calculated with GCOS for P56 vs. P43 and P69 vs. P43 and plotted in Origin8 as a histogram at a bin width of 10.

For overlap comparisons of the hair germ/bulge signatures with previously acquired embryonic hair germ (Rhee et al., 2006), adult anagen/telogen bulge (Blanpain et al., 2004) and hair matrix microarrays (Rendl et al., 2005) present/absent calls and signal values of all probesets were aligned in excel and percentages of shared genes in the signature lists were calculated. Comparisons with multiple different cell populations are not possible with a single set of animals/FACS analysis. When made with multiple datasets, absolute signals cannot be relied upon with accuracy, but the trends are meaningful and consistent with known expression patterns. As judged by these comparisons, we learned that the P69 HG is more similar to the activated (anagen phase) bulge than to the other cell populations, while the P43 HG shows less similarity. These data suggest that as the germ progresses through telogen, it begins to acquire features consistent with an activated stem cell.

### **Semi-quantitative RT-PCR and real-time PCR**

All primer pairs were designed to work at the same settings for real-time PCR using the LightCycler System (Roche, Basel, Switzerland), LightCycler 3.5 software and the LightCycler DNA

Master SYBR Green I reagents. Differences between samples and controls were calculated based on the  $2^{-\Delta\Delta CP}$  method.

Total RNAs were purified from FACS-sorted cells as above, and after quantification with a NANO drop kit, equal amounts of RNAs were reverse transcribed using oligo(dT) primers (Superscript III First-Strand Synthesis System, Invitrogen). cDNAs were adjusted to equal levels by PCR amplification with primers to glyceraldehyde phosphate dehydrogenase (Gapdh). Real-time PCR amplification of genes of interest was performed using the LightCycler 480 (Roche) instrument and reagents. Differences between samples and controls were calculated based on the  $2^{-\Delta\Delta CP}$  method and normalized to Gapdh (Rendl et al., 2008).

### **Growth Factor-Mediated Delivery Using Soaked Beads.**

Intradermal protein solution injection: Recombinant human FGF7, FGF18, FGF10 and recombinant mouse Noggin were obtained from R&D Systems. Reconstitution of the proteins were performed in 0.1% BSA as per the manufacturer's guidelines. For FGF7 dosage dependent assay 50 $\mu$ g/ml, 5 $\mu$ g/ml, or 0.5 $\mu$ g/ml of FGF7 were injected to the competent telogen back skin of adult mice using 30g syringe. For FGF10 dosage dependent assay 100 $\mu$ g/ml, 50 $\mu$ g/ml, or 5 $\mu$ g /ml of FGF10 were used. For noggin induced activation 0.5 $\mu$ g/ml noggin was used. To test the effect of FGF18, 100 $\mu$ g/ml of FGF18 was used. For beads injection: Affinity chromatography Affi-gel blue gel beads (Bio-Rad, Hercules, CA; 100 mm in Diameter) were washed in PBS. Then beads were re-suspended in equal volume of protein solution at 4°C for 30 min. Approximately 100 beads were introduced to the competent telogen skin of adult mice by means of a single puncture wound to the skin made by a 30 g syringe. To replenish proteins, subsequent doses of 10 $\mu$ l protein solution at respective concentration were microinjected to the site of the bead implantation every 24 h by means of a glass micro-needle until the tissue was harvested.





# Supplemental Figure 1

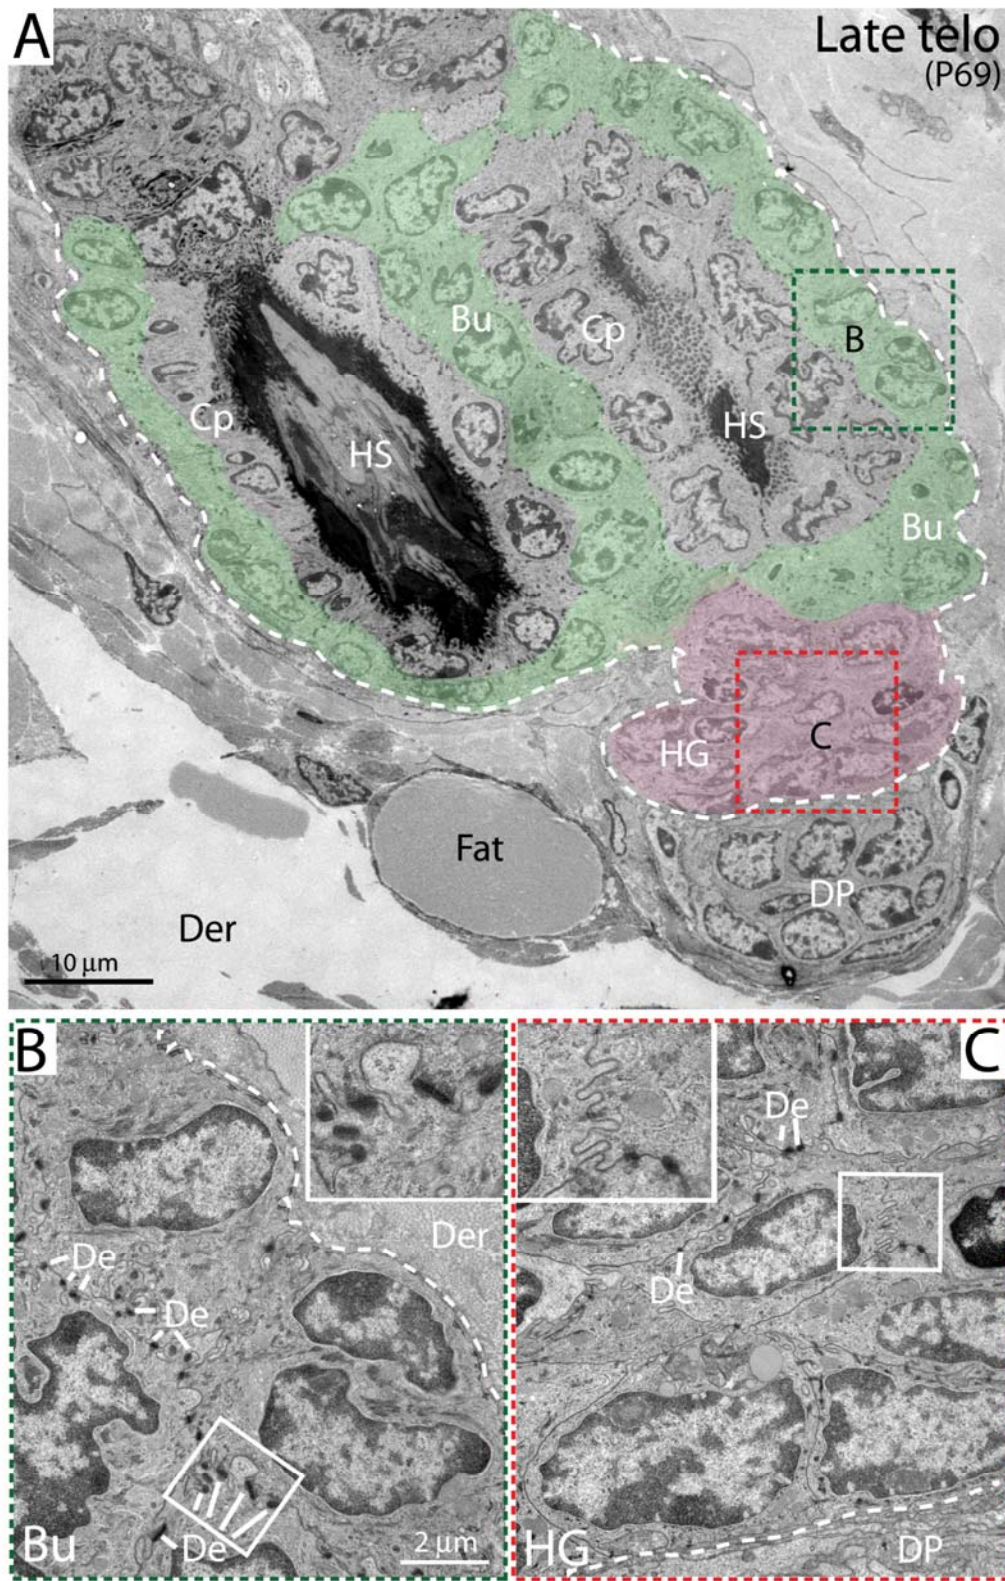

# Supplemental Figure 2

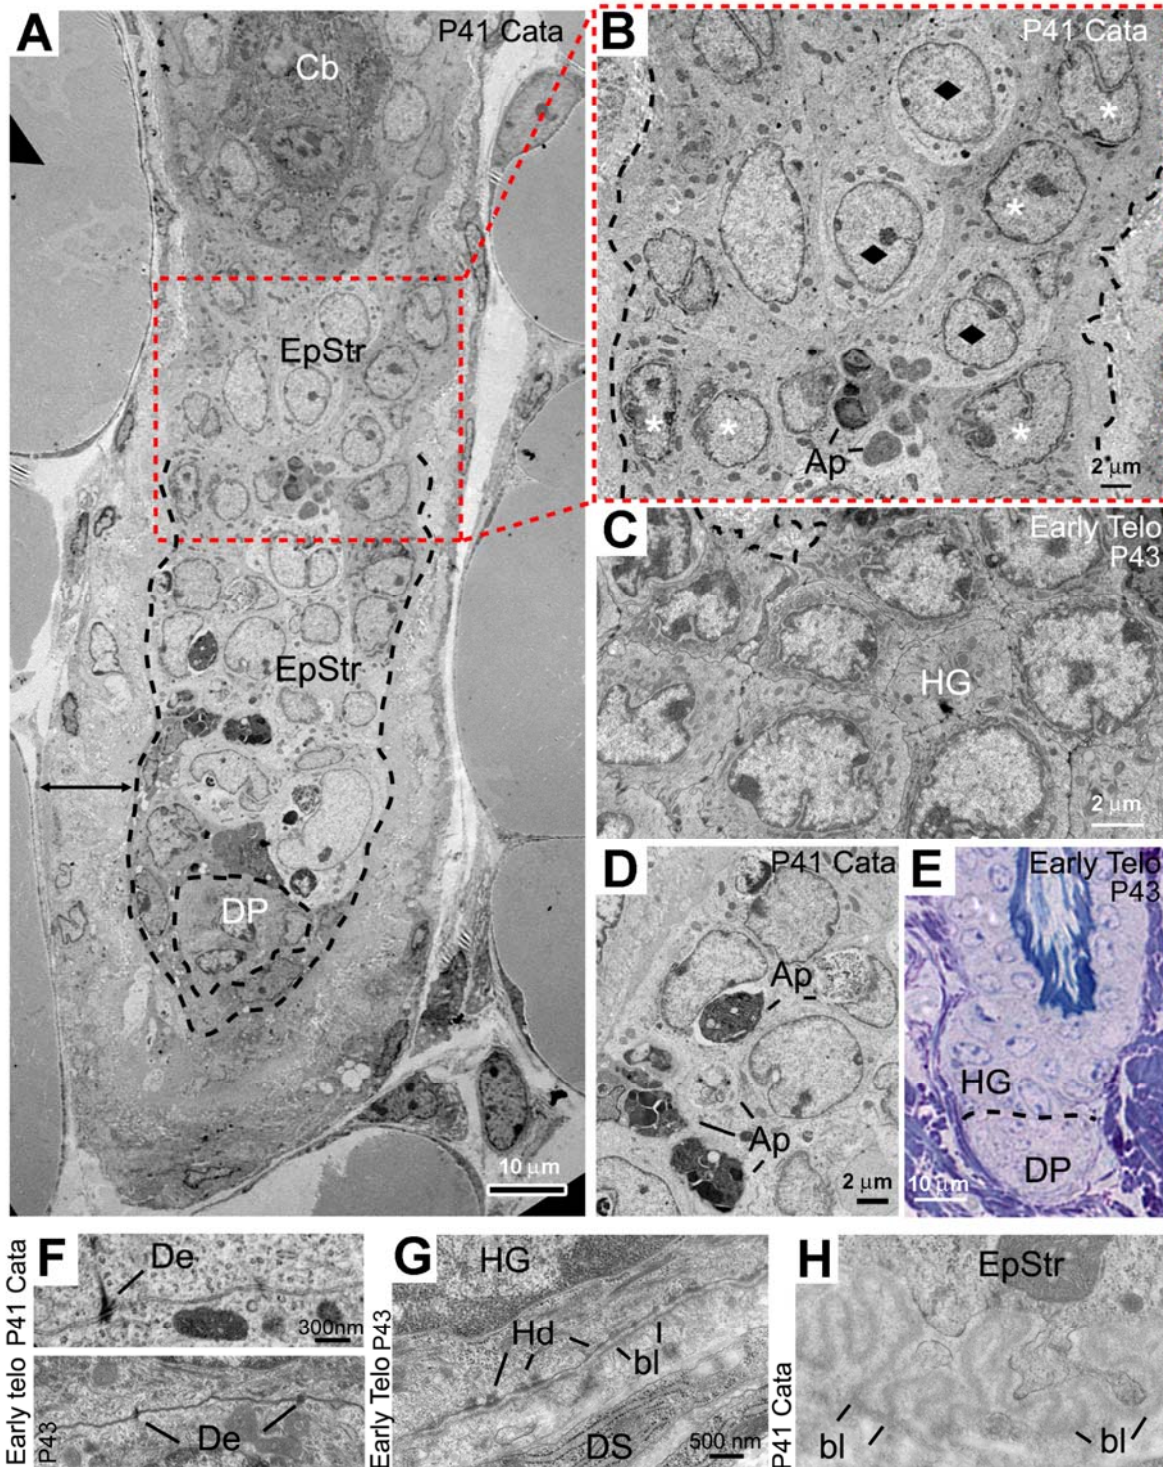

# Supplemental Figure 3

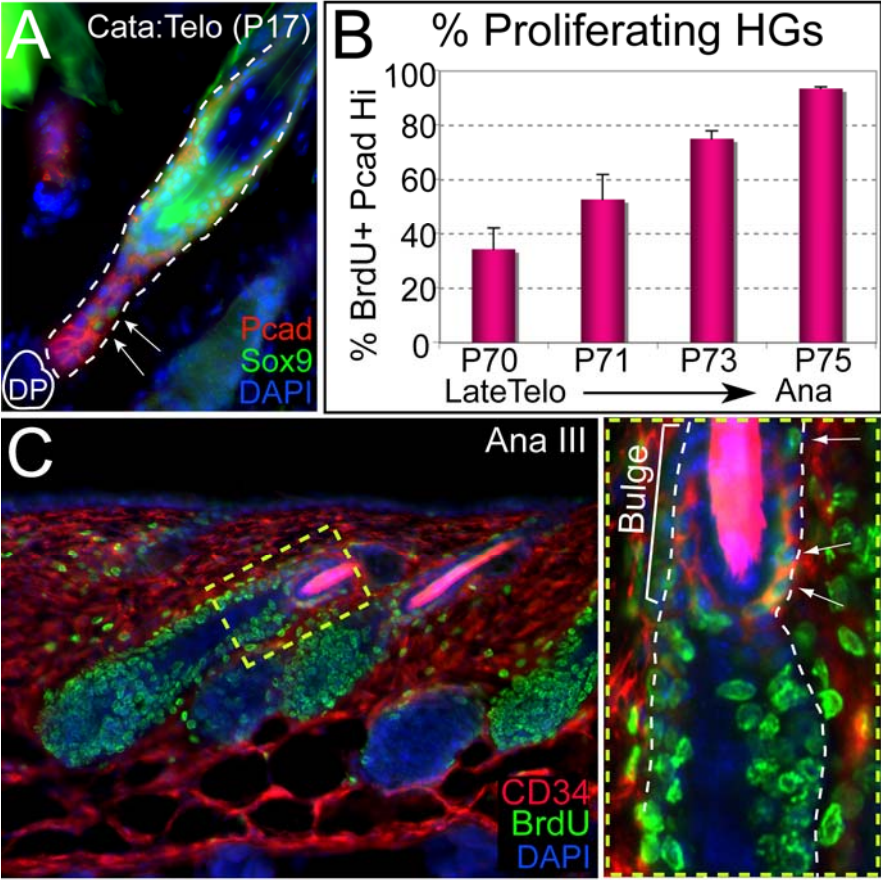

# Supplementary Figure 4

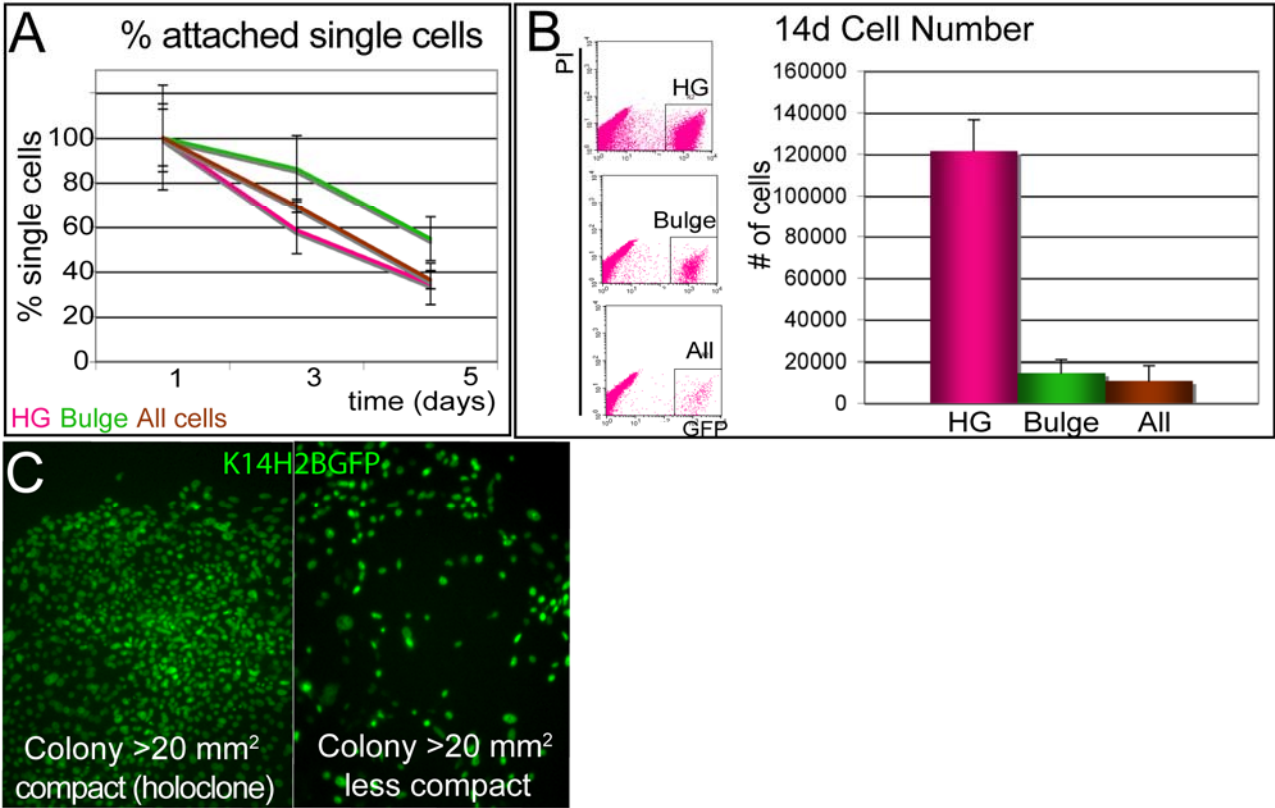

# Supplemental Figure 5

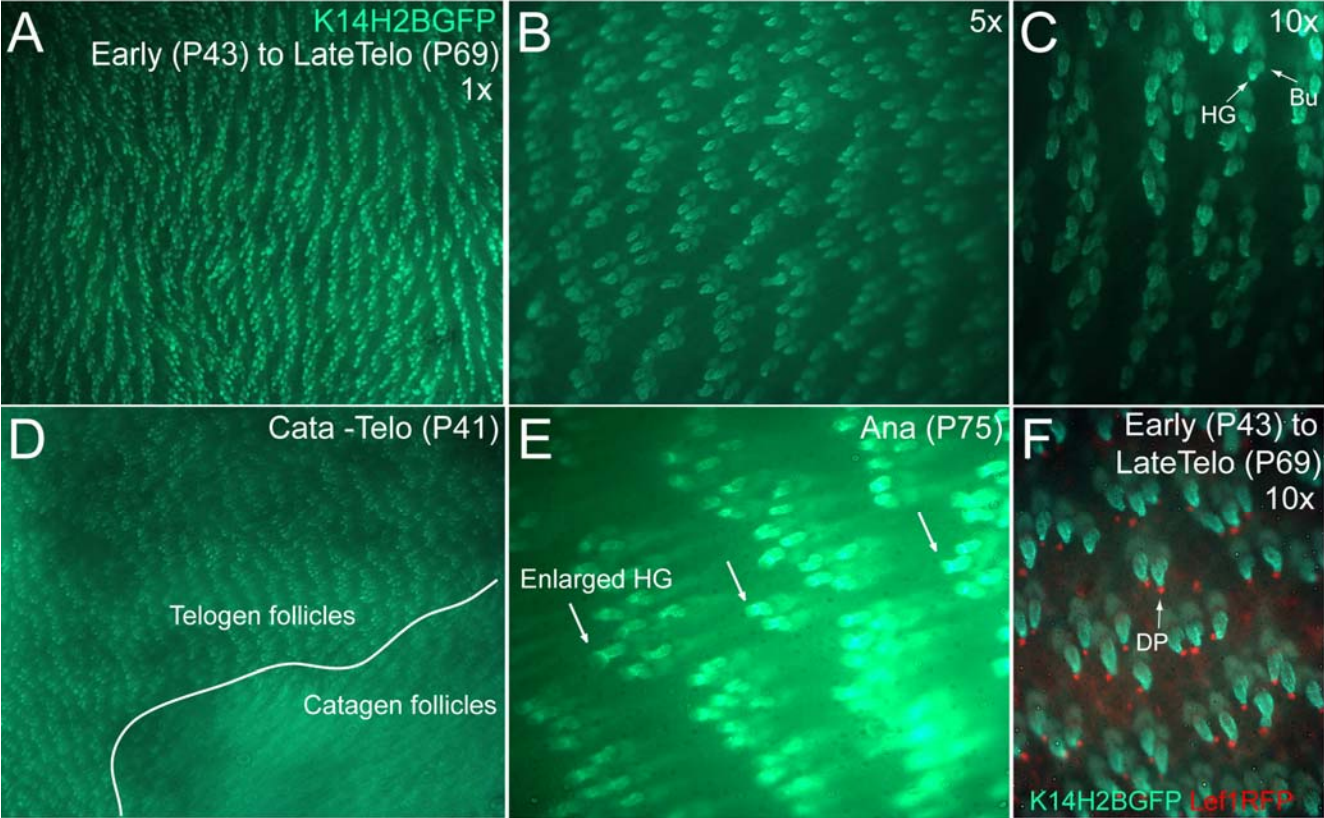

# Supplementary Figure 6

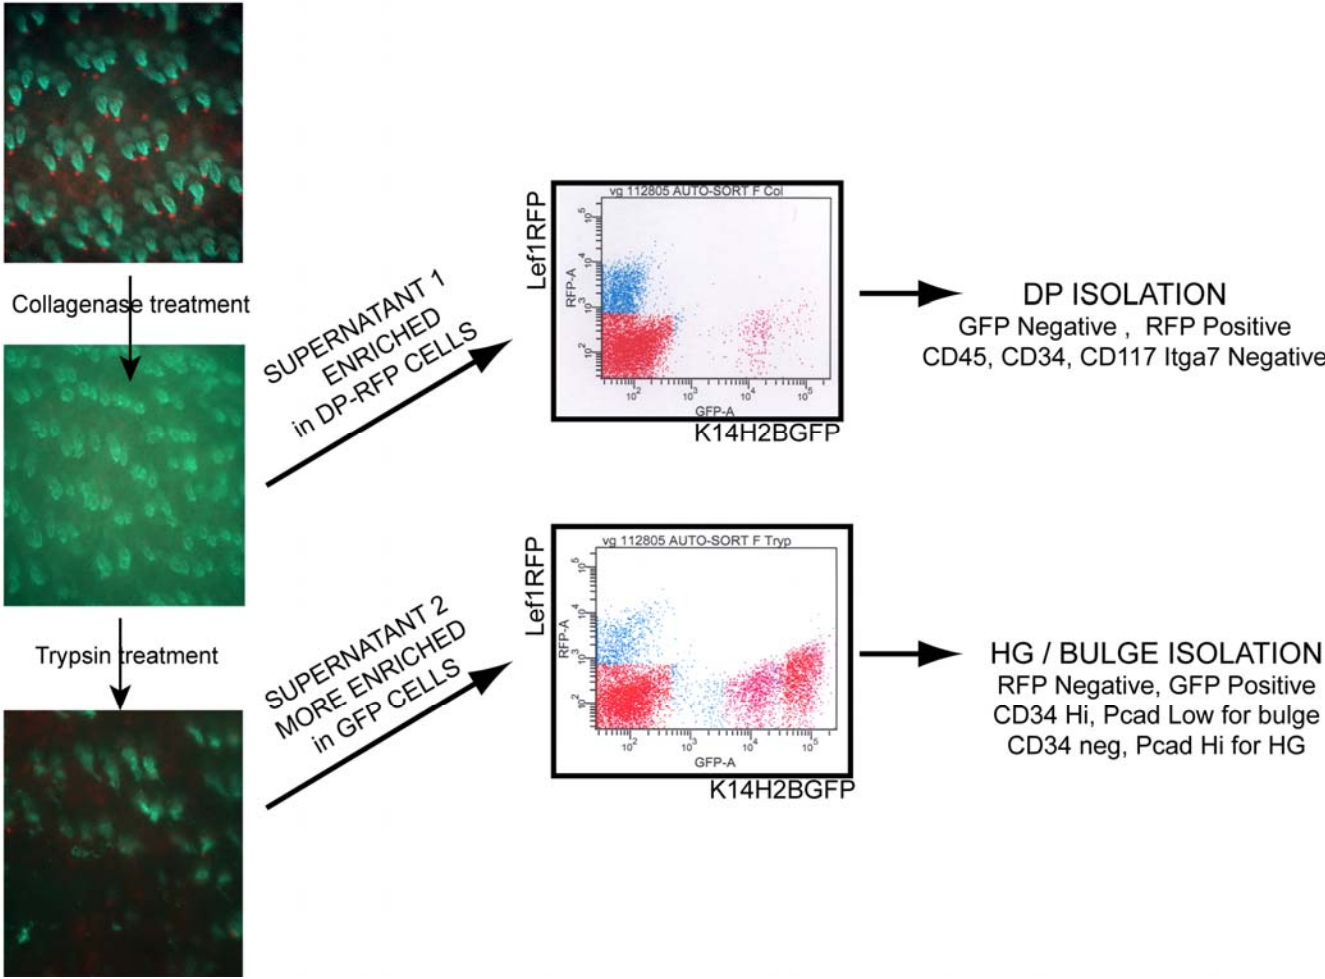

# Supplementary Figure 7

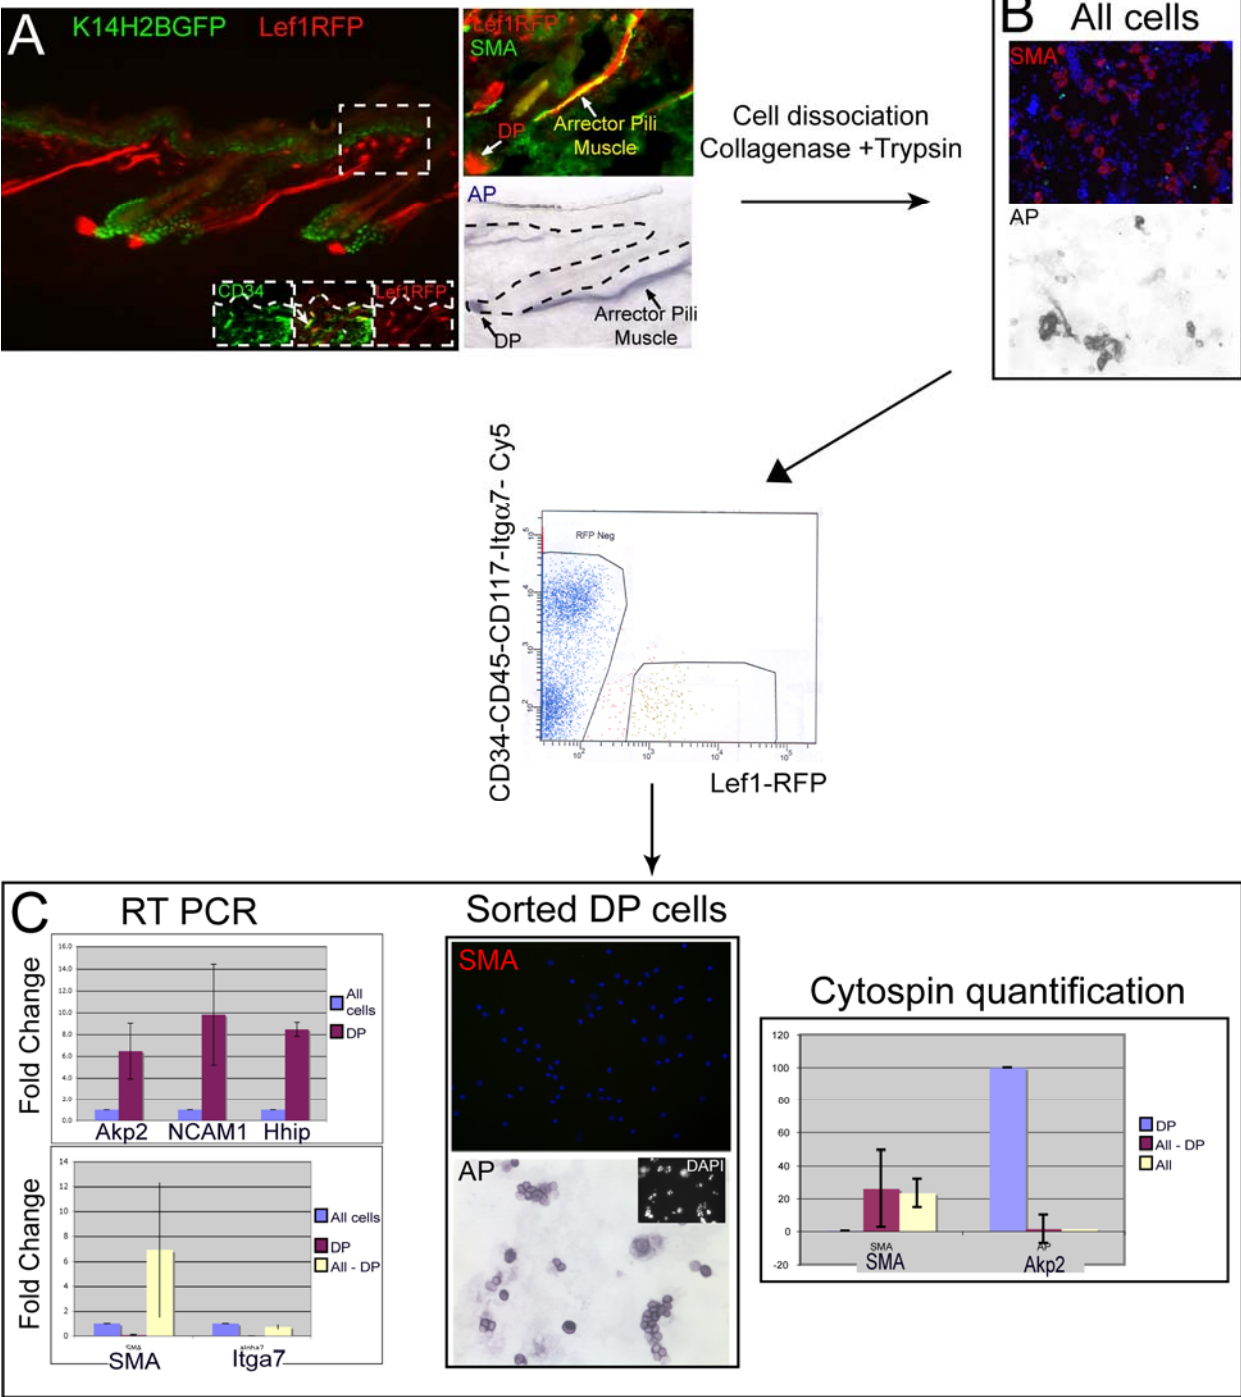



# Supplementary Figure 8

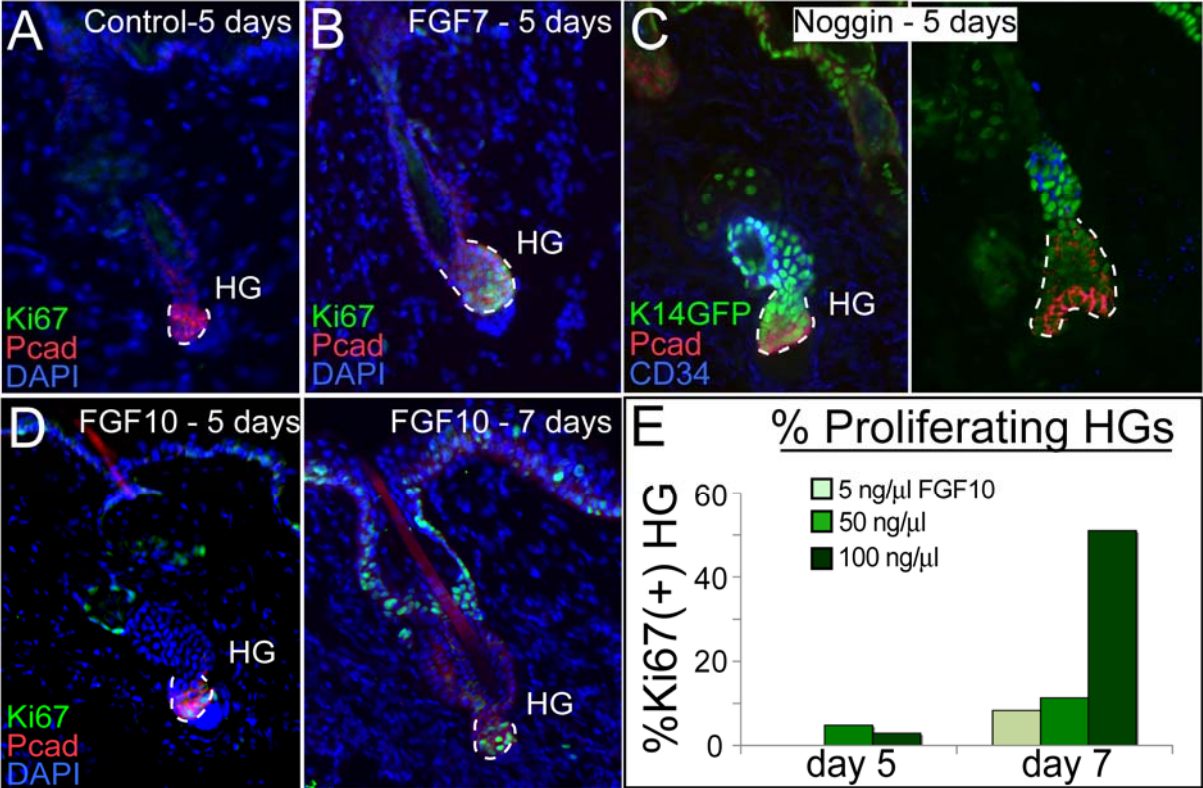

## Model

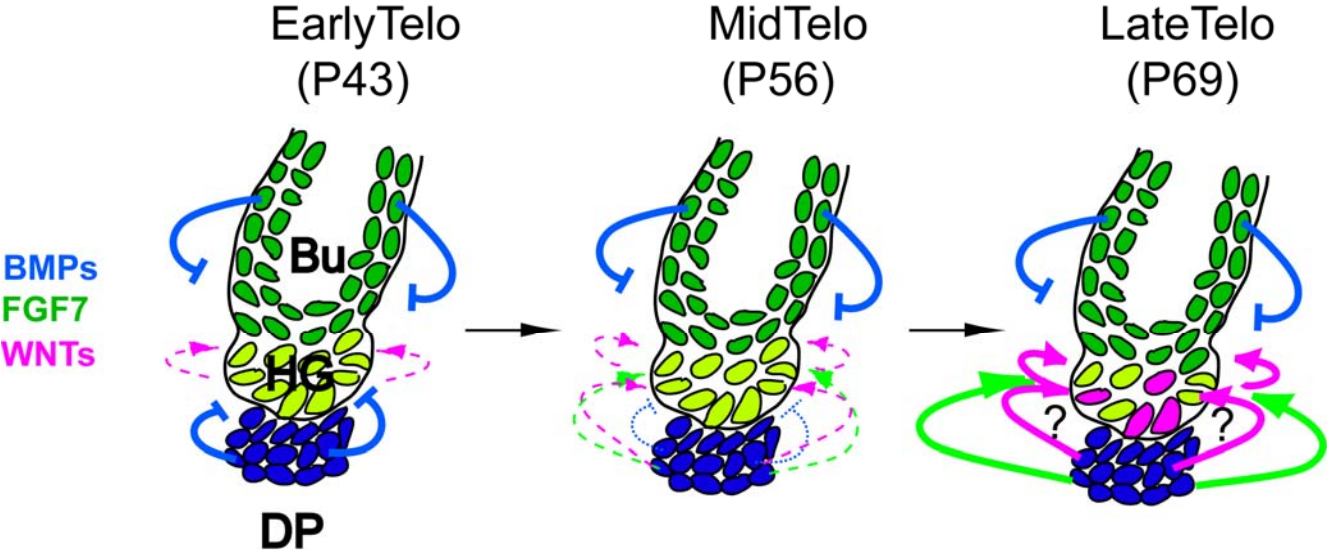

Supplementary Table 1. Overlap between different bulge signatures.

| Probe Set ID | Gene Title (annotation 03/19/2008)                                                                                                                             | Gene Symbol   | Bulge vs HG | Bulge vs Epidermis/ORS |
|--------------|----------------------------------------------------------------------------------------------------------------------------------------------------------------|---------------|-------------|------------------------|
| 1444943_at   | Transcribed locus                                                                                                                                              | ---           | 3.5         | 2.4                    |
| 1455298_at   | Transcribed locus                                                                                                                                              | ---           | 5.7         | 2.6                    |
| 1451930_at   | CDNA clone MGC:27981<br>IMAGE:3596365                                                                                                                          | ---           | 2.3         | 2.7                    |
| 1435221_at   | Adult male corpora quadrigemina<br>cDNA, RIKEN full-length enriched<br>library, clone:B230341P20<br>product:inferred: forkhead box P1,<br>full insert sequence | ---           | 6.1         | 2.9                    |
| 1438802_at   | Transcribed locus                                                                                                                                              | ---           | 3.2         | 5.3                    |
| 1449625_at   | ---                                                                                                                                                            | ---           | 9.2         | 5.4                    |
| 1455961_at   | Transcribed locus                                                                                                                                              | ---           | 9.2         | 13.7                   |
| 1448021_at   | Transcribed locus                                                                                                                                              | ---           | 7.5         | 14.6                   |
| 1456603_at   | RIKEN cDNA 1500005K14 gene                                                                                                                                     | 1500005K14Rik | 9.2         | 8.3                    |
| 1436839_at   | RIKEN cDNA 2010109K11 gene                                                                                                                                     | 2010109K11Rik | 2.0         | 5.1                    |
| 1449357_at   | RIKEN cDNA 2310030G06 gene                                                                                                                                     | 2310030G06Rik | 4.6         | 2.6                    |
| 1420113_s_at | RIKEN cDNA 2410022L05 gene                                                                                                                                     | 2410022L05Rik | 4.0         | 2.3                    |
| 1451634_at   | RIKEN cDNA 2810051F02 gene                                                                                                                                     | 2810051F02Rik | 4.6         | 3.9                    |
| 1423679_at   | RIKEN cDNA 2810432L12 gene                                                                                                                                     | 2810432L12Rik | 3.0         | 3.0                    |
| 1428585_at   | actinin, alpha 1                                                                                                                                               | Actn1         | 6.1         | 4.1                    |
| 1451932_a_at | ADAMTS-like 4                                                                                                                                                  | Adamtsl4      | 24.3        | 6.9                    |
| 1420679_a_at | androgen-induced 1                                                                                                                                             | Aig1          | 2.5         | 2.4                    |
| 1418979_at   | aldo-keto reductase family 1,<br>member C14                                                                                                                    | Akr1c14       | 5.7         | 16.5                   |
| 1423364_a_at | thymoma viral proto-oncogene 1<br>interacting protein                                                                                                          | Aktip         | 2.8         | 2.3                    |
| 1437767_s_at | thymoma viral proto-oncogene 1<br>interacting protein                                                                                                          | Aktip         | 2.3         | 2.7                    |
| 1426300_at   | activated leukocyte cell adhesion<br>molecule                                                                                                                  | Alcam         | 2.5         | 4.6                    |
| 1451461_a_at | aldolase 3, C isoform                                                                                                                                          | Aldoc         | 4.6         | 4.3                    |
| 1454890_at   | angiominin                                                                                                                                                     | Amot          | 2.0         | 3.0                    |
| 1455090_at   | angiopoietin-like 2                                                                                                                                            | Angptl2       | 4.9         | 3.6                    |
| 1450627_at   | progressive ankylosis                                                                                                                                          | Ank           | 7.0         | 3.1                    |
| 1430776_s_at | ankyrin repeat domain 24                                                                                                                                       | Ankrd24       | 2.0         | 2.5                    |
| 1435857_s_at | amyloid beta (A4) precursor-like<br>protein 1                                                                                                                  | Aplp1         | 2.6         | 3.1                    |
| 1421889_a_at | amyloid beta (A4) precursor-like<br>protein 2                                                                                                                  | Aplp2         | 3.5         | 2.1                    |
| 1432344_a_at | amyloid beta (A4) precursor-like<br>protein 2                                                                                                                  | Aplp2         | 2.3         | 3.7                    |
| 1420621_a_at | amyloid beta (A4) precursor protein                                                                                                                            | App           | 2.5         | 2.7                    |
| 1426743_at   | adaptor protein, phosphotyrosine<br>interaction, PH domain and leucine<br>zipper containing 2                                                                  | Appl2         | 4.9         | 2.9                    |

|              |                                                                                              |                            |       |      |
|--------------|----------------------------------------------------------------------------------------------|----------------------------|-------|------|
| 1450460_at   | aquaporin 3                                                                                  | Aqp3                       | 3.5   | 2.3  |
| 1422008_a_at | aquaporin 3                                                                                  | Aqp3                       | 4.3   | 4.5  |
| 1418818_at   | aquaporin 5 /// similar to aquaporin 5                                                       | Aqp5 ///<br>LOC100046616   | 26.0  | 29.8 |
| 1451340_at   | AT rich interactive domain 5A (Mrf1 like)                                                    | Arid5a                     | 2.5   | 2.2  |
| 1415780_a_at | armadillo repeat containing, X-linked 2                                                      | Armcx2                     | 2.8   | 4.2  |
| 1460359_at   | armadillo repeat containing, X-linked 3 /// hypothetical protein<br>LOC100044266             | Armcx3 ///<br>LOC100044266 | 2.8   | 2.5  |
| 1423061_at   | armadillo repeat gene deleted in velo-cardio-facial syndrome                                 | Arvcf                      | 3.7   | 3.0  |
| 1448421_s_at | asporin                                                                                      | Aspn                       | 19.7  | 4.8  |
| 1416652_at   | asporin                                                                                      | Aspn                       | 13.9  | 5.9  |
| 1448211_at   | ATPase, H+ transporting, lysosomal V0 subunit E2                                             | Atp6v0e2                   | 7.0   | 8.1  |
| 1460294_at   | ATPase, aminophospholipid transporter-like, class I, type 8A, member 2                       | Atp8a2                     | 7.0   | 23.0 |
| 1420776_a_at | AU RNA binding protein/enoyl-coenzyme A hydratase                                            | Auh                        | 2.6   | 2.7  |
| 1424680_at   | expressed sequence BB146404                                                                  | BB146404                   | 8.6   | 8.4  |
| 1434943_at   | cDNA sequence BC023055                                                                       | BC023055                   | 2.3   | 2.7  |
| 1456005_a_at | BCL2-like 11 (apoptosis facilitator)                                                         | Bcl2l11                    | 3.7   | 2.3  |
| 1422169_a_at | brain derived neurotrophic factor                                                            | Bdnf                       | 42.2  | 5.6  |
| 1451780_at   | B-cell linker                                                                                | Blnk                       | 5.7   | 3.8  |
| 1450759_at   | bone morphogenetic protein 6                                                                 | Bmp6                       | 24.3  | 14.5 |
| 1426869_at   | biregional cell adhesion molecule-related/down-regulated by oncogenes (Cdon) binding protein | Boc                        | 3.0   | 4.0  |
| 1448687_at   | C1q domain containing 2                                                                      | C1qdc2                     | 5.7   | 2.1  |
| 1439422_a_at | C1q domain containing 2                                                                      | C1qdc2                     | 2.6   | 2.6  |
| 1417393_a_at | C1q domain containing 2                                                                      | C1qdc2                     | 4.0   | 2.7  |
| 1455264_at   | C1q domain containing 2                                                                      | C1qdc2                     | 5.3   | 2.9  |
| 1451620_at   | C1q-like 3                                                                                   | C1ql3                      | 274.4 | 25.4 |
| 1422815_at   | complement component 9                                                                       | C9                         | 5.7   | 2.4  |
| 1421297_a_at | calcium channel, voltage-dependent, L type, alpha 1C subunit                                 | Cacna1c                    | 84.4  | 10.6 |
| 1417378_at   | cell adhesion molecule 1                                                                     | Cadm1                      | 4.3   | 3.1  |
| 1417377_at   | cell adhesion molecule 1                                                                     | Cadm1                      | 3.2   | 3.8  |
| 1417376_a_at | cell adhesion molecule 1                                                                     | Cadm1                      | 4.9   | 3.8  |
| 1424768_at   | caldesmon 1                                                                                  | Cald1                      | 5.7   | 4.3  |
| 1424770_at   | caldesmon 1                                                                                  | Cald1                      | 5.7   | 12.0 |
| 1424769_s_at | caldesmon 1                                                                                  | Cald1                      | 7.5   | 12.0 |
| 1418608_at   | calmodulin-like 3                                                                            | Calml3                     | 16.0  | 6.2  |
| 1450429_at   | calpain 6                                                                                    | Capn6                      | 4.0   | 2.7  |
| 1451398_at   | carbonyl reductase 4 /// similar to carbonic reductase 4                                     | Cbr4 ///<br>LOC100046395   | 2.6   | 2.0  |

|              |                                                                                                                      |                                                                   |        |      |
|--------------|----------------------------------------------------------------------------------------------------------------------|-------------------------------------------------------------------|--------|------|
| 1424407_s_at | chromobox homolog 6                                                                                                  | Cbx6                                                              | 2.1    | 7.3  |
| 1419188_s_at | chemokine (C-C motif) ligand 27 /// similar to chemokine (C-C motif) ligand 27                                       | Ccl27 ///<br>LOC100039863 ///<br>LOC100039939 ///<br>LOC100040048 | 6.5    | 2.7  |
| 1430375_a_at | chemokine (C-C motif) ligand 27 /// similar to chemokine (C-C motif) ligand 27                                       | Ccl27 ///<br>LOC100039863 ///<br>LOC100039939 ///<br>LOC100040048 | 4.9    | 4.0  |
| 1416072_at   | CD34 antigen                                                                                                         | Cd34                                                              | 4096.0 | 20.4 |
| 1422642_at   | CDC42 effector protein (Rho GTPase binding) 3                                                                        | Cdc42ep3                                                          | 2.5    | 2.5  |
| 1450700_at   | CDC42 effector protein (Rho GTPase binding) 3                                                                        | Cdc42ep3                                                          | 2.1    | 3.7  |
| 1449152_at   | cyclin-dependent kinase inhibitor 2B (p15, inhibits CDK4)                                                            | Cdkn2b                                                            | 2.8    | 3.8  |
| 1423233_at   | CCAAT/enhancer binding protein (C/EBP), delta                                                                        | Cebpd                                                             | 2.8    | 4.9  |
| 1427384_at   | chromodomain helicase DNA binding protein 6                                                                          | Chd6                                                              | 2.6    | 2.6  |
| 1452207_at   | Cbp/p300-interacting transactivator, with Glu/Asp-rich carboxy-terminal domain, 2                                    | Cited2                                                            | 8.0    | 4.9  |
| 1448316_at   | CKLF-like MARVEL transmembrane domain containing 3 /// similar to CKLF-like MARVEL transmembrane domain containing 3 | Cmtm3 ///<br>LOC100046883                                         | 2.6    | 8.6  |
| 1427964_at   | CKLF-like MARVEL transmembrane domain containing 8                                                                   | Cmtm8                                                             | 4.0    | 2.8  |
| 1455494_at   | collagen, type I, alpha 1                                                                                            | Col1a1                                                            | 2.3    | 4.9  |
| 1450857_a_at | collagen, type I, alpha 2                                                                                            | Col1a2                                                            | 3.7    | 8.1  |
| 1423110_at   | collagen, type I, alpha 2                                                                                            | Col1a2                                                            | 4.0    | 37.5 |
| 1427884_at   | collagen, type III, alpha 1                                                                                          | Col3a1                                                            | 6.1    | 6.7  |
| 1427883_a_at | collagen, type III, alpha 1                                                                                          | Col3a1                                                            | 3.7    | 36.6 |
| 1424051_at   | collagen, type IV, alpha 2                                                                                           | Col4a2                                                            | 2.1    | 3.4  |
| 1450625_at   | collagen, type V, alpha 2                                                                                            | Col5a2                                                            | 9.8    | 8.7  |
| 1422437_at   | collagen, type V, alpha 2                                                                                            | Col5a2                                                            | 5.7    | 11.5 |
| 1448590_at   | collagen, type VI, alpha 1                                                                                           | Col6a1                                                            | 17.1   | 6.7  |
| 1452250_a_at | collagen, type VI, alpha 2                                                                                           | Col6a2                                                            | 29.9   | 17.9 |
| 1460693_a_at | collagen, type IX, alpha 3                                                                                           | Col9a3                                                            | 42.2   | 77.7 |
| 1418455_at   | coatamer protein complex, subunit zeta 2                                                                             | Copz2                                                             | 2.6    | 2.8  |
| 1424218_a_at | cAMP responsive element binding protein 3-like 4                                                                     | Creb3l4                                                           | 5.7    | 7.1  |
| 1416326_at   | cysteine-rich protein 1 (intestinal)                                                                                 | Crip1                                                             | 3.2    | 5.6  |
| 1423353_at   | cysteine-rich secretory protein LCCL domain containing 1                                                             | Crispld1                                                          | 2.6    | 2.8  |
| 1416455_a_at | crystallin, alpha B                                                                                                  | Cryab                                                             | 52.0   | 5.7  |
| 1434369_a_at | crystallin, alpha B                                                                                                  | Cryab                                                             | 11.3   | 9.8  |
| 1423341_at   | chondroitin sulfate proteoglycan 4                                                                                   | Cspg4                                                             | 2.1    | 5.6  |
| 1416953_at   | connective tissue growth factor                                                                                      | Ctgf                                                              | 7.0    | 9.5  |

|              |                                                                                                        |                         |       |      |
|--------------|--------------------------------------------------------------------------------------------------------|-------------------------|-------|------|
| 1451019_at   | cathepsin F                                                                                            | Ctsf                    | 4.3   | 2.7  |
| 1417868_a_at | cathepsin Z                                                                                            | Ctsz                    | 2.3   | 3.2  |
| 1418456_a_at | chemokine (C-X-C motif) ligand 14                                                                      | Cxcl14                  | 4.6   | 3.1  |
| 1418457_at   | chemokine (C-X-C motif) ligand 14                                                                      | Cxcl14                  | 7.0   | 5.0  |
| 1454268_a_at | cytochrome b-245, alpha polypeptide                                                                    | Cyba                    | 2.8   | 23.7 |
| 1422257_s_at | cytochrome P450, family 2, subfamily b, polypeptide 10                                                 | Cyp2b10                 | 3.0   | 3.7  |
| 1425645_s_at | cytochrome P450, family 2, subfamily b, polypeptide 10                                                 | Cyp2b10                 | 3.0   | 3.9  |
| 1451787_at   | cytochrome P450, family 2, subfamily b, polypeptide 10                                                 | Cyp2b10                 | 4.0   | 4.2  |
| 1419040_at   | cytochrome P450, family 2, subfamily d, polypeptide 22                                                 | Cyp2d22                 | 3.2   | 6.4  |
| 1450839_at   | DNA segment, human D4S114                                                                              | D0H4S114                | 21.1  | 5.9  |
| 1456481_at   | DNA segment, Chr 9, ERATO Doi 280, expressed                                                           | D9Ert280e               | 3.7   | 3.9  |
| 1423805_at   | disabled homolog 2 (Drosophila)                                                                        | Dab2                    | 8.0   | 3.8  |
| 1420498_a_at | disabled homolog 2 (Drosophila)                                                                        | Dab2                    | 14.9  | 16.4 |
| 1423790_at   | death-associated protein                                                                               | Dap                     | 3.5   | 3.2  |
| 1451112_s_at | death-associated protein                                                                               | Dap                     | 2.5   | 3.8  |
| 1451453_at   | death-associated kinase 2                                                                              | Dapk2                   | 6.5   | 3.9  |
| 1450863_a_at | doublecortin-like kinase 1                                                                             | Dclk1                   | 9.2   | 5.1  |
| 1424271_at   | doublecortin-like kinase 1                                                                             | Dclk1                   | 19.7  | 8.3  |
| 1451289_at   | doublecortin-like kinase 1                                                                             | Dclk1                   | 207.9 | 10.2 |
| 1439332_at   | DNA-damage-inducible transcript 4-like                                                                 | Ddit4l                  | 4.6   | 5.6  |
| 1423346_at   | degenerative spermatocyte homolog 1 (Drosophila)                                                       | Degs1                   | 2.8   | 2.1  |
| 1417312_at   | dickkopf homolog 3 (Xenopus laevis)                                                                    | Dkk3                    | 3.7   | 13.4 |
| 1448669_at   | dickkopf homolog 3 (Xenopus laevis)                                                                    | Dkk3                    | 3.0   | 14.4 |
| 1427411_s_at | deleted in lymphocytic leukemia, 2                                                                     | Dleu2                   | 2.6   | 2.1  |
| 1427410_at   | deleted in lymphocytic leukemia, 2                                                                     | Dleu2                   | 2.8   | 2.8  |
| 1426465_at   | discs, large homolog-associated protein 4 (Drosophila)                                                 | Dlgap4                  | 3.2   | 4.0  |
| 1449863_a_at | distal-less homeobox 5                                                                                 | Dlx5                    | 2.8   | 2.1  |
| 1417307_at   | dystrophin, muscular dystrophy                                                                         | Dmd                     | 2.5   | 2.8  |
| 1448665_at   | dystrophin, muscular dystrophy                                                                         | Dmd                     | 3.0   | 2.9  |
| 1434944_at   | dystrophia myotonica-protein kinase                                                                    | Dmpk                    | 3.5   | 8.5  |
| 1434196_at   | DnaJ (Hsp40) homolog, subfamily A, member 4 /// similar to DnaJ (Hsp40) homolog, subfamily A, member 4 | Dnaja4 /// LOC100048331 | 2.8   | 4.4  |
| 1460372_at   | dual oxidase maturation factor 1                                                                       | Duoxa1                  | 3.0   | 7.0  |
| 1431422_a_at | dual specificity phosphatase 14                                                                        | Dusp14                  | 4.6   | 2.1  |
| 1427318_s_at | dysferlin /// fer-1-like 3, myoferlin (C. elegans)                                                     | Dysf /// Fer1l3         | 3.0   | 2.8  |
| 1448613_at   | extracellular matrix protein 1                                                                         | Ecm1                    | 5.3   | 5.7  |
| 1418723_at   | endothelial differentiation, lysophosphatidic acid G-protein-                                          | Edg7                    | 2.5   | 3.3  |

|              |                                                                                                                                                |                                          |       |      |
|--------------|------------------------------------------------------------------------------------------------------------------------------------------------|------------------------------------------|-------|------|
|              | coupled receptor 7                                                                                                                             |                                          |       |      |
| 1449365_at   | endothelial differentiation, sphingolipid G-protein-coupled receptor, 8                                                                        | Edg8                                     | 3.7   | 2.4  |
| 1427367_at   | EF-hand calcium binding domain 4A                                                                                                              | Efcab4a                                  | 5.3   | 4.3  |
| 1422302_s_at | ferritin light chain 1 /// ferritin light chain 2 /// ferritin light chain 1 pseudogene /// predicted gene, EG665937                           | EG665937 /// Ftl1 /// Ftl2 /// mCG_17237 | 6.5   | 3.0  |
| 1419332_at   | EGF-like-domain, multiple 6                                                                                                                    | Egfl6                                    | 8.0   | 5.5  |
| 1421883_at   | ELAV (embryonic lethal, abnormal vision, Drosophila)-like 2 (Hu antigen B)                                                                     | Elavl2                                   | 4.9   | 17.5 |
| 1415856_at   | embigin                                                                                                                                        | Emb                                      | 2.1   | 2.5  |
| 1417104_at   | epithelial membrane protein 3                                                                                                                  | Emp3                                     | 3.7   | 2.8  |
| 1424801_at   | enabled homolog (Drosophila)                                                                                                                   | Enah                                     | 2.8   | 3.0  |
| 1450061_at   | ectodermal-neural cortex 1                                                                                                                     | Enc1                                     | 5.7   | 7.4  |
| 1420965_a_at | ectodermal-neural cortex 1                                                                                                                     | Enc1                                     | 9.8   | 10.1 |
| 1419276_at   | ectonucleotide pyrophosphatase/phosphodiesterase 1                                                                                             | Enpp1                                    | 2.5   | 3.3  |
| 1427807_at   | predicted gene, ENSMUSG00000060559                                                                                                             | ENSMUSG00000060559                       | 2.8   | 2.2  |
| 1450380_at   | ependymin related protein 1 (zebrafish)                                                                                                        | Epdr1                                    | 8.0   | 9.8  |
| 1422438_at   | epoxide hydrolase 1, microsomal                                                                                                                | Ephx1                                    | 2.0   | 3.0  |
| 1422824_s_at | epidermal growth factor receptor pathway substrate 8                                                                                           | Eps8                                     | 6.5   | 6.3  |
| 1422823_at   | epidermal growth factor receptor pathway substrate 8 /// similar to Epidermal growth factor receptor kinase substrate 8                        | Eps8 /// LOC632638                       | 7.0   | 4.2  |
| 1452280_at   | FERM, RhoGEF (Arhgef) and pleckstrin domain protein 1 (chondrocyte-derived) /// similar to FERMRhoGEF (Arhgef) and pleckstrin domain protein 1 | Farp1 /// LOC100045542                   | 16.0  | 6.0  |
| 1451119_a_at | fibulin 1                                                                                                                                      | Fbln1                                    | 2.0   | 4.3  |
| 1422831_at   | fibrillin 2                                                                                                                                    | Fbn2                                     | 18.4  | 5.9  |
| 1427155_at   | FCH and double SH3 domains 1                                                                                                                   | Fchsd1                                   | 2.5   | 3.5  |
| 1434180_at   | fermitin family homolog 2 (Drosophila)                                                                                                         | Fermt2                                   | 4.3   | 4.4  |
| 1456014_s_at | fermitin family homolog 3 (Drosophila)                                                                                                         | Fermt3                                   | 18.4  | 2.6  |
| 1450869_at   | fibroblast growth factor 1                                                                                                                     | Fgf1                                     | 2.8   | 2.6  |
| 1423136_at   | fibroblast growth factor 1                                                                                                                     | Fgf1                                     | 5.7   | 4.6  |
| 1449545_at   | fibroblast growth factor 18                                                                                                                    | Fgf18                                    | 548.7 | 6.5  |
| 1417872_at   | four and a half LIM domains 1                                                                                                                  | Fhl1                                     | 9.8   | 3.1  |
| 1426750_at   | filamin, beta                                                                                                                                  | Flnb                                     | 6.5   | 5.9  |
| 1419485_at   | forkhead box C1                                                                                                                                | Foxc1                                    | 9.8   | 3.6  |

|              |                                                                                                                         |                                               |      |      |
|--------------|-------------------------------------------------------------------------------------------------------------------------|-----------------------------------------------|------|------|
| 1419486_at   | forkhead box C1                                                                                                         | Foxc1                                         | 8.0  | 3.9  |
| 1455242_at   | forkhead box P1                                                                                                         | Foxp1                                         | 7.5  | 2.4  |
| 1435222_at   | forkhead box P1                                                                                                         | Foxp1                                         | 4.6  | 2.5  |
| 1421141_a_at | forkhead box P1                                                                                                         | Foxp1                                         | 4.9  | 2.9  |
| 1421140_a_at | forkhead box P1                                                                                                         | Foxp1                                         | 4.9  | 3.1  |
| 1421142_s_at | forkhead box P1                                                                                                         | Foxp1                                         | 5.3  | 3.6  |
| 1421365_at   | follistatin                                                                                                             | Fst                                           | 3.5  | 3.7  |
| 1448259_at   | follistatin-like 1                                                                                                      | Fstl1                                         | 7.5  | 15.1 |
| 1416221_at   | follistatin-like 1                                                                                                      | Fstl1                                         | 6.1  | 17.6 |
| 1418364_a_at | ferritin light chain 1                                                                                                  | Ftl1                                          | 5.3  | 3.2  |
| 1418532_at   | frizzled homolog 2 (Drosophila)                                                                                         | Fzd2                                          | 11.3 | 5.5  |
| 1418533_s_at | frizzled homolog 2 (Drosophila)                                                                                         | Fzd2                                          | 7.0  | 8.4  |
| 1418534_at   | frizzled homolog 2 (Drosophila)                                                                                         | Fzd2                                          | 8.0  | 15.7 |
| 1449730_s_at | frizzled homolog 3 (Drosophila)                                                                                         | Fzd3                                          | 3.7  | 2.7  |
| 1450135_at   | frizzled homolog 3 (Drosophila)                                                                                         | Fzd3                                          | 4.0  | 4.9  |
| 1450044_at   | frizzled homolog 7 (Drosophila)                                                                                         | Fzd7                                          | 8.6  | 3.4  |
| 1416419_s_at | gamma-aminobutyric acid (GABA(A)) receptor-associated protein-like 1                                                    | Gabarapl1                                     | 2.0  | 2.1  |
| 1424007_at   | growth differentiation factor 10                                                                                        | Gdf10                                         | 59.7 | 28.6 |
| 1424076_at   | glycerophosphodiester phosphodiesterase domain containing 1                                                             | Gdpd1                                         | 39.4 | 2.4  |
| 1417594_at   | G kinase anchoring protein 1                                                                                            | Gkap1                                         | 4.3  | 2.6  |
| 1422504_at   | glycine receptor, beta subunit                                                                                          | Glrb                                          | 7.0  | 3.7  |
| 1419316_s_at | guanine nucleotide binding protein (G protein), beta polypeptide 1-like<br>/// similar to mKIAA1645 protein             | Gnb11 ///<br>LOC100044103                     | 2.5  | 4.0  |
| 1419689_at   | glypican 6 /// similar to Glypican 6                                                                                    | Gpc6 ///<br>LOC100045283                      | 4.9  | 3.5  |
| 1419688_at   | glypican 6 /// similar to Glypican 6                                                                                    | Gpc6 ///<br>LOC100045283                      | 9.8  | 4.4  |
| 1426462_at   | gephyrin                                                                                                                | Gphn                                          | 4.6  | 3.2  |
| 1426463_at   | gephyrin                                                                                                                | Gphn                                          | 4.0  | 3.4  |
| 1423091_a_at | glycoprotein m6b                                                                                                        | Gpm6b                                         | 2.3  | 5.0  |
| 1450881_s_at | G protein-coupled receptor 137B                                                                                         | Gpr137b                                       | 2.5  | 2.2  |
| 1439255_s_at | G protein-coupled receptor 137B ///<br>G protein-coupled receptor 137B,<br>pseudogene /// similar to Gpr137b<br>protein | Gpr137b ///<br>Gpr137b-ps ///<br>LOC100044979 | 4.6  | 2.3  |
| 1417673_at   | growth factor receptor bound protein 14                                                                                 | Grb14                                         | 8.6  | 3.0  |
| 1425357_a_at | gremlin 1                                                                                                               | Grem1                                         | 9.2  | 19.7 |
| 1427676_a_at | glutamate receptor, ionotropic, kainate 1                                                                               | Grik1                                         | 32.0 | 4.8  |
| 1421350_a_at | glutamate receptor interacting protein 1                                                                                | Grip1                                         | 8.0  | 2.8  |
| 1435951_at   | glutamate receptor interacting protein 1                                                                                | Grip1                                         | 6.5  | 4.9  |

|              |                                                                                                                                         |                                         |      |      |
|--------------|-----------------------------------------------------------------------------------------------------------------------------------------|-----------------------------------------|------|------|
| 1415812_at   | gelsolin                                                                                                                                | Gsn                                     | 2.5  | 2.8  |
| 1449169_at   | hyaluronan synthase 2                                                                                                                   | Has2                                    | 3.7  | 4.0  |
| 1449024_a_at | hexosaminidase A                                                                                                                        | Hexa                                    | 2.8  | 5.6  |
| 1460180_at   | hexosaminidase B                                                                                                                        | Hexb                                    | 8.6  | 4.3  |
| 1437874_s_at | hexosaminidase B                                                                                                                        | Hexb                                    | 4.9  | 9.4  |
| 1415999_at   | hairy/enhancer-of-split related with YRPW motif 1                                                                                       | Hey1                                    | 13.9 | 30.5 |
| 1421426_at   | Hedgehog-interacting protein                                                                                                            | Hhip                                    | 26.0 | 3.8  |
| 1422155_at   | histone cluster 2, H3c2                                                                                                                 | Hist2h3c2                               | 5.7  | 3.4  |
| 1450780_s_at | high mobility group AT-hook 2                                                                                                           | Hmga2                                   | 2.6  | 2.3  |
| 1424367_a_at | homer homolog 2 (Drosophila)                                                                                                            | Homer2                                  | 10.6 | 6.7  |
| 1451776_s_at | HOP homeobox                                                                                                                            | Hopx                                    | 4.6  | 2.2  |
| 1455626_at   | homeo box A9                                                                                                                            | Hoxa9                                   | 3.5  | 2.3  |
| 1418415_at   | homeo box B5                                                                                                                            | Hoxb5                                   | 3.0  | 4.3  |
| 1451660_a_at | homeo box B6                                                                                                                            | Hoxb6                                   | 6.1  | 2.4  |
| 1452412_at   | homeo box C8                                                                                                                            | Hoxc8                                   | 2.1  | 2.3  |
| 1431099_at   | homeo box D8                                                                                                                            | Hoxd8                                   | 27.9 | 7.4  |
| 1419126_at   | homeo box D9                                                                                                                            | Hoxd9                                   | 26.0 | 6.8  |
| 1448812_at   | hippocalcin-like 1                                                                                                                      | Hpcal1                                  | 3.2  | 2.6  |
| 1419905_s_at | hydroxyprostaglandin dehydrogenase 15 (NAD)                                                                                             | Hpgd                                    | 3.7  | 4.5  |
| 1434642_at   | hydroxysteroid (17-beta) dehydrogenase 11                                                                                               | Hsd17b11                                | 8.6  | 3.0  |
| 1449010_at   | heat shock protein 4 like                                                                                                               | Hspa4l                                  | 2.1  | 2.4  |
| 1417013_at   | heat shock protein 8                                                                                                                    | Hspb8                                   | 2.5  | 2.3  |
| 1453596_at   | inhibitor of DNA binding 2                                                                                                              | Id2                                     | 3.5  | 8.5  |
| 1422537_a_at | inhibitor of DNA binding 2                                                                                                              | Id2                                     | 48.5 | 8.9  |
| 1435176_a_at | inhibitor of DNA binding 2                                                                                                              | Id2                                     | 5.3  | 9.6  |
| 1416630_at   | inhibitor of DNA binding 3                                                                                                              | Id3                                     | 4.6  | 3.7  |
| 1423260_at   | inhibitor of DNA binding 4 /// similar to Id4                                                                                           | Id4 ///<br>LOC100045546                 | 2.1  | 2.6  |
| 1423259_at   | inhibitor of DNA binding 4 /// similar to Id4                                                                                           | Id4 ///<br>LOC100045546                 | 3.0  | 3.3  |
| 1450048_a_at | isocitrate dehydrogenase 2 (NADP+), mitochondrial                                                                                       | Idh2                                    | 2.1  | 2.0  |
| 1419647_a_at | immediate early response 3                                                                                                              | Ier3                                    | 2.1  | 3.1  |
| 1418929_at   | intraflagellar transport 57 homolog (Chlamydomonas)                                                                                     | Ift57                                   | 8.6  | 8.7  |
| 1419286_s_at | intraflagellar transport 81 homolog (Chlamydomonas)                                                                                     | Ift81                                   | 2.8  | 4.0  |
| 1452114_s_at | insulin-like growth factor binding protein 5                                                                                            | Igfbp5                                  | 7.0  | 5.8  |
| 1417505_s_at | interleukin 11 receptor, alpha chain 1 /// interleukin 11 receptor, alpha chain 2 /// similar to interleukin 11 receptor, alpha chain 2 | Il11ra1 /// Il11ra2 ///<br>LOC100038993 | 3.5  | 2.3  |
| 1451535_at   | interleukin 31 receptor A                                                                                                               | Il31ra                                  | 7.0  | 13.3 |
| 1423274_at   | integrator complex subunit 6                                                                                                            | Ints6                                   | 2.8  | 2.9  |



|              |                                                                                                                              |                           |       |      |
|--------------|------------------------------------------------------------------------------------------------------------------------------|---------------------------|-------|------|
| 1452327_at   | IQ motif and Sec7 domain 1                                                                                                   | Iqsec1                    | 2.5   | 3.2  |
| 1423608_at   | integral membrane protein 2A                                                                                                 | Itm2a                     | 2.8   | 11.7 |
| 1450350_a_at | Jun dimerization protein 2                                                                                                   | Jundm2                    | 2.3   | 3.2  |
| 1449158_at   | potassium channel, subfamily K, member 2                                                                                     | Kcnk2                     | 29.9  | 15.4 |
| 1424848_at   | potassium large conductance calcium-activated channel, subfamily M, alpha member 1                                           | Kcma1                     | 17.1  | 3.1  |
| 1422945_a_at | kinesin family member 5C                                                                                                     | Kif5c                     | 9.8   | 9.9  |
| 1460678_at   | kelch domain containing 2                                                                                                    | Klhdc2                    | 4.6   | 2.0  |
| 1435086_s_at | kelch domain containing 2                                                                                                    | Klhdc2                    | 3.7   | 2.3  |
| 1426481_at   | kelch-like 22 (Drosophila)                                                                                                   | Klhl22                    | 2.1   | 5.5  |
| 1427378_at   | keratin 75                                                                                                                   | Krt75                     | 24.3  | 3.1  |
| 1419619_at   | keratin 80                                                                                                                   | Krt80                     | 3.0   | 2.2  |
| 1419573_a_at | lectin, galactose binding, soluble 1                                                                                         | Lgals1                    | 3.5   | 3.9  |
| 1455439_a_at | lectin, galactose binding, soluble 1                                                                                         | Lgals1                    | 3.7   | 5.4  |
| 1424594_at   | lectin, galactose binding, soluble 7                                                                                         | Lgals7                    | 3.5   | 5.2  |
| 1450988_at   | leucine rich repeat containing G protein coupled receptor 5                                                                  | Lgr5                      | 4.6   | 13.4 |
| 1418317_at   | LIM homeobox protein 2                                                                                                       | Lhx2                      | 6.5   | 12.9 |
| 1418478_at   | LIM domain only 1                                                                                                            | Lmo1                      | 3.2   | 3.3  |
| 1455056_at   | LIM domain only 7                                                                                                            | Lmo7                      | 3.0   | 3.2  |
| 1425779_a_at | T-box 1 /// similar to T-box 1                                                                                               | LOC100044104 /// Tbx1     | 4.9   | 8.5  |
| 1419717_at   | sema domain, immunoglobulin domain (Ig), short basic domain, secreted, (semaphorin) 3E /// hypothetical protein LOC100044162 | LOC100044162 /// Sema3e   | 16.0  | 7.5  |
| 1417580_s_at | selenium binding protein 1 /// hypothetical protein LOC100044204                                                             | LOC100044204 /// Selenbp1 | 4.9   | 3.3  |
| 1450699_at   | selenium binding protein 1 /// hypothetical protein LOC100044204                                                             | LOC100044204 /// Selenbp1 | 7.0   | 3.4  |
| 1450928_at   | similar to Id4                                                                                                               | LOC100045546              | 2.6   | 4.4  |
| 1456140_at   | similar to OPR                                                                                                               | LOC100045988              | 274.4 | 2.5  |
| 1420401_a_at | receptor (calcitonin) activity modifying protein 3 /// similar to receptor activity modifying protein 3                      | LOC100046186 /// Ramp3    | 2.8   | 2.6  |
| 1418932_at   | nuclear factor, interleukin 3, regulated /// similar to NFIL3/E4BP4 transcription factor                                     | LOC100046232 /// Nfil3    | 3.7   | 9.6  |
| 1421998_at   | torsin family 3, member A /// similar to ADIR1                                                                               | LOC100047963 /// Tor3a    | 2.6   | 2.3  |
| 1418505_at   | nudix (nucleoside diphosphate linked moiety X)-type motif 4 /// similar to Nudt4 protein                                     | LOC100048122 /// Nudt4    | 5.3   | 3.2  |
| 1424460_s_at | lysophosphatidylcholine acyltransferase 1                                                                                    | Lpcat1                    | 4.3   | 3.2  |
| 1433842_at   | leucine rich repeat (in FLII) interacting protein 1                                                                          | Lrrfip1                   | 2.3   | 2.5  |

|              |                                                                              |         |      |      |
|--------------|------------------------------------------------------------------------------|---------|------|------|
| 1437477_at   | leucine rich repeat (in FLII) interacting protein 1                          | Lrrfip1 | 3.5  | 2.5  |
| 1418061_at   | latent transforming growth factor beta binding protein 2                     | Ltbp2   | 19.7 | 18.4 |
| 1438312_s_at | latent transforming growth factor beta binding protein 3                     | Ltbp3   | 2.5  | 3.3  |
| 1418049_at   | latent transforming growth factor beta binding protein 3                     | Ltbp3   | 2.8  | 3.6  |
| 1451490_at   | lysophospholipase-like 1                                                     | Lyplal1 | 4.6  | 3.9  |
| 1460335_at   | LysM, putative peptidoglycan-binding, domain containing 3                    | Lysmd3  | 2.3  | 2.2  |
| 1428847_a_at | microtubule-actin crosslinking factor 1                                      | Macf1   | 3.2  | 3.2  |
| 1423284_at   | MANSC domain containing 1                                                    | Mansc1  | 9.2  | 6.0  |
| 1449630_s_at | MAP/microtubule affinity-regulating kinase 1                                 | Mark1   | 21.1 | 3.2  |
| 1452864_at   | mediator of RNA polymerase II transcription, subunit 12 homolog (yeast)-like | Med12l  | 24.3 | 2.8  |
| 1420911_a_at | milk fat globule-EGF factor 8 protein                                        | Mfge8   | 6.5  | 8.3  |
| 1422025_at   | microphthalmia-associated transcription factor                               | Mitf    | 3.2  | 4.2  |
| 1455214_at   | microphthalmia-associated transcription factor                               | Mitf    | 5.3  | 7.6  |
| 1428835_at   | myosin, heavy polypeptide 14                                                 | Myh14   | 6.5  | 2.6  |
| 1450468_at   | myocilin                                                                     | Myoc    | 9.8  | 12.8 |
| 1448428_at   | neuroblastoma, suppression of tumorigenicity 1                               | Nbl1    | 2.5  | 3.2  |
| 1420760_s_at | N-myc downstream regulated gene 1                                            | Ndrp1   | 4.6  | 3.0  |
| 1450976_at   | N-myc downstream regulated gene 1                                            | Ndrp1   | 5.3  | 3.4  |
| 1423413_at   | N-myc downstream regulated gene 1                                            | Ndrp1   | 2.6  | 4.8  |
| 1448154_at   | N-myc downstream regulated gene 2                                            | Ndrp2   | 5.3  | 3.0  |
| 1436188_a_at | N-myc downstream regulated gene 4                                            | Ndrp4   | 2.3  | 3.2  |
| 1426615_s_at | N-myc downstream regulated gene 4                                            | Ndrp4   | 2.0  | 3.4  |
| 1418947_at   | NIMA (never in mitosis gene a)-related expressed kinase 3                    | Nek3    | 5.3  | 3.7  |
| 1417879_at   | neuron derived neurotrophic factor                                           | Nenf    | 4.3  | 2.1  |
| 1425761_a_at | nuclear factor of activated T-cells, cytoplasmic, calcineurin-dependent 1    | Nfatc1  | 3.7  | 2.3  |
| 1417621_at   | nuclear factor of activated T-cells, cytoplasmic, calcineurin-dependent 1    | Nfatc1  | 9.2  | 2.4  |
| 1416473_a_at | neighbor of Punc E11                                                         | Nope    | 39.4 | 9.0  |
| 1416474_at   | neighbor of Punc E11                                                         | Nope    | 34.3 | 11.7 |
| 1434877_at   | neuronal pentraxin 1                                                         | Nptx1   | 7.0  | 3.3  |
| 1448758_at   | nuclear receptor binding factor 2                                            | Nrbf2   | 2.5  | 2.5  |
| 1434709_at   | neuron-glia-CAM-related cell adhesion molecule                               | Nrcam   | 17.1 | 7.5  |
| 1424882_a_at | 5'-nucleotidase domain containing 2                                          | Nt5dc2  | 2.1  | 4.9  |

|              |                                                                                                              |          |       |      |
|--------------|--------------------------------------------------------------------------------------------------------------|----------|-------|------|
| 1426887_at   | nudix (nucleoside diphosphate linked moiety X)-type motif 11                                                 | Nudt11   | 12.1  | 3.2  |
| 1420718_at   | odd Oz/ten-m homolog 2 (Drosophila)                                                                          | Odz2     | 3.2   | 4.8  |
| 1419108_at   | oligophrenin 1                                                                                               | Ophn1    | 3.5   | 2.4  |
| 1427228_at   | palladin, cytoskeletal associated protein                                                                    | Palld    | 2.6   | 3.5  |
| 1426910_at   | PRKC, apoptosis, WT1, regulator                                                                              | Pawr     | 2.3   | 2.5  |
| 1418713_at   | pterin 4 alpha carbinolamine dehydratase/dimerization cofactor of hepatocyte nuclear factor 1 alpha (TCF1) 1 | Pcbd1    | 4.6   | 2.8  |
| 1417526_at   | poly(rC) binding protein 3                                                                                   | Pcbp3    | 3.7   | 3.0  |
| 1449178_at   | PDZ and LIM domain 3                                                                                         | Pdlim3   | 157.6 | 14.3 |
| 1417689_a_at | PDZK1 interacting protein 1                                                                                  | Pdzk1ip1 | 4.6   | 2.4  |
| 1455477_s_at | PDZK1 interacting protein 1                                                                                  | Pdzk1ip1 | 3.7   | 2.7  |
| 1416846_a_at | PDZ domain containing RING finger 3                                                                          | Pdzrn3   | 13.9  | 5.9  |
| 1417355_at   | paternally expressed 3                                                                                       | Peg3     | 11.3  | 2.6  |
| 1433924_at   | Paternally expressed 3                                                                                       | Peg3     | 14.9  | 8.9  |
| 1418209_a_at | profilin 2                                                                                                   | Pfn2     | 9.8   | 4.1  |
| 1418210_at   | profilin 2                                                                                                   | Pfn2     | 9.8   | 5.5  |
| 1437062_s_at | phytanoyl-CoA hydroxylase interacting protein-like                                                           | Phyhipl  | 4.3   | 7.8  |
| 1420411_a_at | phosphatidylinositol 4-kinase type 2 beta                                                                    | Pi4k2b   | 2.3   | 3.0  |
| 1416489_at   | phosphatidylinositol 4-kinase type 2 beta                                                                    | Pi4k2b   | 2.5   | 3.6  |
| 1425514_at   | phosphatidylinositol 3-kinase, regulatory subunit, polypeptide 1 (p85 alpha)                                 | Pik3r1   | 7.0   | 3.3  |
| 1460210_at   | polycystic kidney disease 1 homolog                                                                          | Pkd1     | 3.0   | 5.8  |
| 1417753_at   | polycystic kidney disease 2                                                                                  | Pkd2     | 2.0   | 3.5  |
| 1449799_s_at | plakophilin 2                                                                                                | Pkp2     | 16.0  | 10.1 |
| 1415806_at   | plasminogen activator, tissue                                                                                | Plat     | 2.3   | 2.5  |
| 1451753_at   | plexin A2                                                                                                    | Plxna2   | 13.9  | 3.6  |
| 1417133_at   | peripheral myelin protein                                                                                    | Pmp22    | 13.0  | 16.4 |
| 1423371_at   | polymerase (DNA-directed), epsilon 4 (p12 subunit)                                                           | Pole4    | 2.5   | 2.5  |
| 1422619_at   | phosphatidic acid phosphatase 2a                                                                             | Ppap2a   | 8.0   | 11.4 |
| 1422620_s_at | phosphatidic acid phosphatase 2a                                                                             | Ppap2a   | 9.2   | 11.8 |
| 1448908_at   | phosphatidic acid phosphatase type 2B                                                                        | Ppap2b   | 2.1   | 3.0  |
| 1434099_at   | Peroxisome proliferative activated receptor, gamma, coactivator 1 alpha                                      | Ppargc1a | 9.2   | 2.4  |
| 1460336_at   | peroxisome proliferative activated receptor, gamma, coactivator 1 alpha                                      | Ppargc1a | 2.8   | 2.5  |
| 1456395_at   | peroxisome proliferative activated receptor, gamma, coactivator 1                                            | Ppargc1a | 5.7   | 3.0  |

|              |                                                                                     |         |       |      |
|--------------|-------------------------------------------------------------------------------------|---------|-------|------|
|              | alpha                                                                               |         |       |      |
| 1428351_at   | protein phosphatase 1M                                                              | Ppm1m   | 3.5   | 2.0  |
| 1433691_at   | protein phosphatase 1, regulatory (inhibitor) subunit 3C                            | Ppp1r3c | 147.0 | 15.5 |
| 1428265_at   | protein phosphatase 2 (formerly 2A), regulatory subunit A (PR 65), beta isoform     | Ppp2r1b | 2.0   | 2.6  |
| 1455958_s_at | PTC7 protein phosphatase homolog ( <i>S. cerevisiae</i> )                           | Pptc7   | 2.0   | 2.4  |
| 1424906_at   | PQ loop repeat containing                                                           | Pqlc3   | 2.3   | 2.1  |
| 1422673_at   | protein kinase C, mu                                                                | Prkcm   | 11.3  | 5.9  |
| 1416844_at   | protein arginine N-methyltransferase 2                                              | Prmt2   | 2.1   | 2.1  |
| 1453578_at   | phosphotriesterase related                                                          | Pter    | 3.7   | 2.3  |
| 1422324_a_at | parathyroid hormone-like peptide                                                    | Pthlh   | 8.6   | 4.4  |
| 1448254_at   | pleiotrophin                                                                        | Ptn     | 3.5   | 3.5  |
| 1416211_a_at | pleiotrophin                                                                        | Ptn     | 4.0   | 6.8  |
| 1456315_a_at | protein tyrosine phosphatase-like (proline instead of catalytic arginine), member a | Ptpla   | 2.5   | 5.3  |
| 1423277_at   | protein tyrosine phosphatase, receptor type, K                                      | Ptprk   | 6.1   | 3.7  |
| 1423278_at   | protein tyrosine phosphatase, receptor type, K                                      | Ptprk   | 5.3   | 5.2  |
| 1451690_a_at | poliovirus receptor-related 4                                                       | Pvrl4   | 4.3   | 3.3  |
| 1450541_at   | plasmacytoma variant translocation 1                                                | Pvt1    | 7.5   | 2.4  |
| 1452324_at   | plasmacytoma variant translocation 1                                                | Pvt1    | 5.7   | 10.2 |
| 1417829_a_at | RAB15, member RAS oncogene family                                                   | Rab15   | 2.1   | 3.6  |
| 1443856_at   | rabaptin, RAB GTPase binding effector protein 1                                     | Rabep1  | 3.2   | 2.0  |
| 1417400_at   | retinoic acid induced 14                                                            | Rai14   | 2.1   | 3.0  |
| 1417481_at   | receptor (calcitonin) activity modifying protein 1                                  | Ramp1   | 55.7  | 27.5 |
| 1449027_at   | ras homolog gene family, member U                                                   | Rhou    | 3.7   | 2.4  |
| 1449028_at   | ras homolog gene family, member U                                                   | Rhou    | 4.3   | 2.7  |
| 1434628_a_at | rhophilin, Rho GTPase binding protein 2                                             | Rhpn2   | 4.6   | 4.8  |
| 1435105_at   | ring finger protein 208                                                             | Rnf208  | 2.5   | 2.8  |
| 1419814_s_at | S100 calcium binding protein A1                                                     | S100a1  | 4.3   | 3.3  |
| 1424542_at   | S100 calcium binding protein A4                                                     | S100a4  | 14.9  | 22.4 |
| 1421375_a_at | S100 calcium binding protein A6 (calcyclin)                                         | S100a6  | 4.6   | 3.6  |
| 1427020_at   | scavenger receptor class A, member 3                                                | Scara3  | 2.6   | 9.5  |
| 1420764_at   | scrapie responsive gene 1                                                           | Scrg1   | 2.5   | 6.7  |
| 1453486_a_at | signal peptide, CUB domain, EGF-like 2                                              | Scube2  | 9.2   | 2.3  |

|              |                                                                                                              |            |      |      |
|--------------|--------------------------------------------------------------------------------------------------------------|------------|------|------|
| 1417011_at   | syndecan 2                                                                                                   | Sdc2       | 4.0  | 2.6  |
| 1448545_at   | syndecan 2                                                                                                   | Sdc2       | 3.5  | 2.7  |
| 1450027_at   | syndecan 3                                                                                                   | Sdc3       | 3.5  | 2.2  |
| 1450941_at   | syndecan binding protein                                                                                     | Sdcbp      | 2.8  | 3.1  |
| 1419478_at   | secreted and transmembrane 1B                                                                                | Sectm1b    | 2.8  | 2.6  |
| 1449451_at   | serine (or cysteine) peptidase inhibitor, clade B (ovalbumin), member 11                                     | Serpinb11  | 9.8  | 6.2  |
| 1448395_at   | secreted frizzled-related protein 1                                                                          | Sfrp1      | 2.3  | 6.1  |
| 1460337_at   | SH3-domain kinase binding protein 1                                                                          | Sh3kbp1    | 29.9 | 4.8  |
| 1431592_a_at | SH3-domain kinase binding protein 1                                                                          | Sh3kbp1    | 7.0  | 6.2  |
| 1455149_at   | SH3 domain containing ring finger 1                                                                          | Sh3rf1     | 4.3  | 3.4  |
| 1416832_at   | solute carrier family 39 (metal ion transporter), member 8                                                   | Slc39a8    | 4.0  | 2.5  |
| 1421346_a_at | solute carrier family 6 (neurotransmitter transporter, taurine), member 6                                    | Slc6a6     | 2.1  | 2.7  |
| 1427086_at   | slit homolog 3 (Drosophila)                                                                                  | Slit3      | 5.3  | 3.7  |
| 1423389_at   | MAD homolog 7 (Drosophila)                                                                                   | Smad7      | 3.5  | 2.7  |
| 1448321_at   | SPARC related modular calcium binding 1                                                                      | Smoc1      | 11.3 | 6.8  |
| 1417300_at   | sphingomyelin phosphodiesterase, acid-like 3B                                                                | Smpdl3b    | 2.3  | 3.1  |
| 1417788_at   | synuclein, gamma                                                                                             | Sncg       | 68.6 | 29.4 |
| 1424950_at   | SRY-box containing gene 9                                                                                    | Sox9       | 4.0  | 3.6  |
| 1451538_at   | SRY-box containing gene 9                                                                                    | Sox9       | 3.2  | 4.9  |
| 1448664_a_at | SPEG complex locus                                                                                           | Speg       | 5.7  | 13.4 |
| 1424876_s_at | spastic paraplegia 20, spartin (Troyer syndrome) homolog (human)                                             | Spg20      | 3.0  | 2.4  |
| 1451520_at   | spastic paraplegia 20, spartin (Troyer syndrome) homolog (human)                                             | Spg20      | 3.7  | 2.7  |
| 1422106_a_at | splA/ryanodine receptor domain and SOCS box containing 2                                                     | Spsb2      | 2.6  | 2.6  |
| 1420641_a_at | sulfide quinone reductase-like (yeast)                                                                       | Sqrdl      | 2.6  | 2.7  |
| 1448743_at   | synovial sarcoma, X breakpoint 2 interacting protein                                                         | Ssx2ip     | 3.5  | 4.0  |
| 1419420_at   | ST6 (alpha-N-acetyl-neuraminy-2,3-beta-galactosyl-1,3)-N-acetylgalactosaminide alpha-2,6-sialyltransferase 5 | St6galnac5 | 2.8  | 8.1  |
| 1420377_at   | ST8 alpha-N-acetyl-neuraminide alpha-2,8-sialyltransferase 2                                                 | St8sia2    | 6.1  | 8.3  |
| 1434442_at   | starch binding domain 1                                                                                      | Stbd1      | 2.8  | 3.3  |
| 1423038_at   | syntaxin 6                                                                                                   | Stx6       | 3.5  | 2.2  |
| 1430388_a_at | sulfatase 2                                                                                                  | Sulf2      | 10.6 | 4.0  |
| 1423258_at   | synaptotagmin IX                                                                                             | Syt9       | 10.6 | 2.6  |
| 1425745_a_at | transforming, acidic coiled-coil containing protein 2                                                        | Tacc2      | 2.1  | 2.5  |
| 1424918_at   | TBC1 domain family, member 19                                                                                | Tbc1d19    | 3.5  | 2.7  |

|              |                                                                          |           |      |      |
|--------------|--------------------------------------------------------------------------|-----------|------|------|
| 1424634_at   | transcription elongation factor A (SII)-like 1                           | Tceal1    | 5.7  | 3.4  |
| 1450117_at   | transcription factor 3                                                   | Tcf3      | 4.3  | 5.5  |
| 1429427_s_at | transcription factor 7-like 2, T-cell specific, HMG-box                  | Tcf712    | 2.6  | 2.4  |
| 1423340_at   | transcription factor AP-2 beta                                           | Tcfap2b   | 2.5  | 2.7  |
| 1418484_at   | tektin 2                                                                 | Tekt2     | 13.0 | 15.1 |
| 1427055_at   | thioesterase superfamily member 4                                        | Them4     | 4.3  | 2.3  |
| 1449621_s_at | thrombospondin, type I, domain 1                                         | Thsd1     | 13.9 | 11.3 |
| 1418205_at   | thrombospondin, type I, domain 1                                         | Thsd1     | 21.1 | 13.7 |
| 1460287_at   | tissue inhibitor of metalloproteinase 2                                  | Timp2     | 5.3  | 7.6  |
| 1433662_s_at | tissue inhibitor of metalloproteinase 2                                  | Timp2     | 9.2  | 8.9  |
| 1454677_at   | tissue inhibitor of metalloproteinase 2                                  | Timp2     | 7.0  | 9.3  |
| 1457676_at   | toll-interleukin 1 receptor (TIR) domain-containing adaptor protein      | Tirap     | 3.2  | 2.3  |
| 1452666_a_at | transmembrane and coiled-coil domains 2                                  | Tmcc2     | 4.0  | 76.8 |
| 1428074_at   | transmembrane protein 158                                                | Tmem158   | 2.1  | 4.4  |
| 1426628_at   | transmembrane protein 34                                                 | Tmem34    | 2.5  | 3.0  |
| 1423851_a_at | transmembrane protein 46                                                 | Tmem46    | 9.2  | 14.6 |
| 1423852_at   | transmembrane protein 46                                                 | Tmem46    | 6.5  | 17.0 |
| 1449033_at   | tumor necrosis factor receptor superfamily, member 11b (osteoprotegerin) | Tnfrsf11b | 10.6 | 7.7  |
| 1419283_s_at | tensin 1                                                                 | Tns1      | 4.3  | 2.9  |
| 1423721_at   | tropomyosin 1, alpha                                                     | Tpm1      | 3.2  | 3.2  |
| 1421733_a_at | protein-tyrosine sulfotransferase 1                                      | Tpst1     | 2.0  | 4.0  |
| 1417027_at   | tripartite motif protein 2                                               | Trim2     | 3.2  | 2.3  |
| 1455315_at   | transformation related protein 53 inducible protein 13                   | Trp53i13  | 2.1  | 2.8  |
| 1417545_at   | transient receptor potential cation channel, subfamily V, member 4       | Trpv4     | 2.0  | 17.9 |
| 1432417_a_at | tetraspanin 2                                                            | Tspan2    | 9.2  | 3.0  |
| 1424567_at   | tetraspanin 2                                                            | Tspan2    | 26.0 | 6.5  |
| 1424568_at   | tetraspanin 2                                                            | Tspan2    | 36.8 | 7.4  |
| 1427284_a_at | tocopherol (alpha) transfer protein                                      | Ttpa      | 4.0  | 7.3  |
| 1427347_s_at | tubulin, beta 2a                                                         | Tubb2a    | 4.0  | 3.4  |
| 1452679_at   | tubulin, beta 2b                                                         | Tubb2b    | 4.0  | 4.1  |
| 1416689_at   | tuftelin 1                                                               | Tuft1     | 2.3  | 2.5  |
| 1416308_at   | UDP-glucose dehydrogenase                                                | Ugdh      | 2.6  | 2.1  |
| 1426399_at   | von Willebrand factor A domain containing 1                              | Vwa1      | 5.3  | 3.1  |
| 1448146_at   | WW domain containing E3 ubiquitin protein ligase 2                       | Wwp2      | 6.5  | 5.3  |
| 1448145_at   | WW domain containing E3 ubiquitin protein ligase 2                       | Wwp2      | 6.1  | 6.7  |

|            |                         |        |     |     |
|------------|-------------------------|--------|-----|-----|
| 1420944_at | zinc finger protein 185 | Zfp185 | 2.6 | 2.5 |
| 1417240_at | zyxin                   | Zyx    | 2.1 | 3.0 |

**Supplemental Table 1. Refining the Bulge Signature: Genes Upregulated in the Bulge When Compared Against Both Epidermal and Hair Lineages**

Comparisons between our previous telogen bulge signature determined by comparing the bulge to basal epidermis/upper ORS cells (Blanpain et al., 2004; Lowry et al., 2005; Tumber et al., 2004) and our new signature derived by comparing the bulge to HG. Interestingly, ~50% of upregulated genes were common to both bulge signatures. Included in the telogen bulge signature after refinement against two skin lineages were *Bmp6*, FGF18 and NFATc1 involved in SC quiescence; essential SC transcription factors Lhx2, Sox9 and Tcf3; and key SC markers Lgr5, CD34 and S100A6. Affymetrix P value cut off is 0.0075.
